# **Ethanol stimulates trehalose production through a SpoT-DksA-AlgU dependent pathway in *Pseudomonas aeruginosa***

Colleen E. Harty<sup>1</sup>, Dorival Martins<sup>2</sup>, Georgia Doing<sup>1</sup>, Dallas L. Mould<sup>1</sup>, Michelle E. Clay<sup>1</sup>, Dao  
Nguyen<sup>2,3</sup>, Deborah A. Hogan<sup>1\*</sup>

<sup>1</sup>Microbiology and Immunology, Geisel School of Medicine at Dartmouth, Hanover, NH, USA.

<sup>2</sup>Meakins-Christie Laboratories and Translational Research in Respiratory Diseases Program,  
Research Institute of the McGill University Health Centre, Montréal, QC H4A 3J1, Canada

<sup>3</sup>Department of Medicine, McGill University, Montréal, QC H4A 3J1, Canada

\*To whom correspondence should be addressed

Department of Microbiology and Immunology, Geisel School of Medicine at Dartmouth

Rm 208 Vail Building, Hanover, NH 03755

E-mail: [dhogan@dartmouth.edu](mailto:dhogan@dartmouth.edu)

Tel: (603) 650-1252

Fax: (603) 650-1318

## 24 **Abstract**

25 *Pseudomonas aeruginosa* frequently resides among ethanol-producing microbes,  
 26 making its response to these microbially-produced concentrations of ethanol relevant to  
 27 understanding its biology. Our transcriptome analysis found that the genes involved in  
 28 trehalose metabolism were induced by low concentrations of ethanol, and levels of intracellular  
 29 trehalose increased significantly upon growth with ethanol. The increase in trehalose was  
 30 dependent on the TreYZ pathway, but not other trehalose metabolic enzymes TreS or TreA.  
 31 The sigma factor AlgU (AlgT), a homolog of RpoE in other species, was required for increased  
 32 expression of the *treZ* gene and trehalose levels, but induction was not controlled by the well-  
 33 characterized proteolysis of its antisigma factor MucA. Growth with ethanol led to increased  
 34 SpoT-dependent (p)ppGpp accumulation, which stimulates AlgU-dependent transcription of  
 35 *treZ* and other AlgU-regulated genes through DksA, a (p)ppGpp and RNA polymerase binding  
 36 protein. Ethanol stimulation of trehalose also required acylhomoserine lactone (AHL)-mediated  
 37 quorum sensing, as induction was not observed in a  $\Delta lasR \Delta rhIR$  strain. A network analysis  
 38 using a model, eADAGE, built from publicly available *P. aeruginosa* transcriptome datasets (1)  
 39 provided strong support for our model that *treZ* and co-regulated genes are controlled by both  
 40 AlgU and AHL-mediated QS (QS). Consistent with (p)ppGpp and AHL-mediated quorum  
 41 sensing regulation, ethanol, even when added at the time of culture inoculation, stimulated *treZ*  
 42 transcript levels and trehalose production in cells from post-exponential phase cultures but not  
 43 from exponential phase cultures. These data highlight the integration of growth and cell density  
 44 cues in the *P. aeruginosa* transcriptional response to ethanol.

## 45 **Importance**

46 *Pseudomonas aeruginosa* is often found with bacteria and fungi that produce  
 47 fermentation products including ethanol. At concentrations similar to those produced by  
 48 environmental microbes, we found that ethanol stimulated expression of trehalose biosynthetic  
 49 genes and cellular levels of trehalose, a disaccharide that protects against environmental  
 50 stresses. The induction of trehalose by ethanol required the alternative sigma factor AlgU  
 51 through DksA and SpoT-dependent (p)ppGpp. Trehalose accumulation also required AHL  
 52 quorum sensing and only occurred in post-exponential phase cultures. This work highlights  
 53 how cells integrate cell-density and growth cues in their responses to products made by other  
 54 microbes and a reveals a new role for (p)ppGpp in the regulation of AlgU activity.

## 55 Introduction

56 *Pseudomonas aeruginosa* is a ubiquitous Gram-negative bacterium that can cause  
57 acute and chronic infections in a broad range of hosts. *P. aeruginosa* frequently causes  
58 chronic infections in individuals with the genetic disorder cystic fibrosis (CF). Diverse bacterial  
59 and fungal taxa often co-infect with *P. aeruginosa* in CF airways (2-6), and many of these taxa  
60 are robust fermenters capable of ethanol production (7, 8). Ethanol has also been identified as  
61 a volatile biomarker in exhaled breath condensates that discriminates between healthy  
62 individuals and those with CF (9).

63 Ethanol has a range of biological activities that vary based on its concentration. At  
64 concentrations in the 3-5% range and higher, ethanol can inhibit growth or kill *P. aeruginosa*  
65 (10-12). The effects of biologically-produced concentrations of ethanol within the range  
66 experienced by organisms in polymicrobial communities (0.1-1.1%) (13-21) have been less  
67 well studied. Several studies have shown that 1% ethanol can alter pathogenesis and  
68 interspecies interactions (13, 15, 17, 19). In *Acinetobacter baumannii*, ethanol enhances  
69 virulence toward *Caenorhabditis elegans* (17) and *Galleria mellonella* (19). This may be due to  
70 enhanced production of cytotoxic phospholipase C and increased expression of nutrient  
71 uptake pathways (18). In *P. aeruginosa*, ethanol produced by *C. albicans* influences the  
72 expression of the antifungal phenazine 5-methyl phenazine-1-carboxylic acid (5MPCA) and 1%  
73 ethanol was sufficient to modulate phenazine production and stimulate the exopolysaccharide  
74 Pel and Psl-mediated biofilm and pellicle formation (13, 16).

75 The *P. aeruginosa* alternative sigma factor, AlgU, also named AlgT, has been well-  
76 studied for its positive regulation of production of alginate, an exopolysaccharide (22, 23). AlgU  
77 is an extracytoplasmic sigma factor that is homologous to RpoE ( $\sigma^E$  or  $\sigma^{22}$ ) in other Gram-

negative bacteria (24). *P. aeruginosa* mutants lacking *algU* have increased resistance to hydrogen peroxide compared to alginate over-producing mucoid counterparts due to transcriptional de-repression of catalase *kata*, but are more susceptible to host antimicrobial peptides (25, 26). In other species,  $\sigma^E$  is necessary for fitness in response to high concentrations of ethanol (3-10%) and inhibitory concentrations of salt (27-30). A well-known mechanism of activation of  $\sigma^E$  in response to stresses that perturb the cell envelope is by proteolytic degradation of its anti-sigma factor by specific proteases (31, 32). In *P. aeruginosa*, the AlgU anti-sigma factor is MucA, and *mucA* mutations lead to high AlgU activity. Naturally-occurring *mucA* mutants are frequently observed in populations from chronic *P. aeruginosa* lung infections and strains overproduce alginate (33, 34).

In *E. coli* and *Salmonella enterica*,  $\sigma^E$  activity can also be modulated by the alarmone (p)ppGpp (35, 36). (p)ppGpp is an intracellular molecular signal that is synthesized by either the synthase RelA or a hybrid synthase/hydrolase, SpoT (37) in response to nutrient limitation and various environmental stressors (38). (p)ppGpp can complex with the RNA polymerase binding protein DksA to promote transcription initiation and elongation and alter the effects of RNA polymerase-associated sigma factors including RpoE (39, 40).

In this work, we show that a sub inhibitory concentration of ethanol (1%) induces the expression of genes involved in the metabolism of trehalose and biochemical assays found significant increases in intracellular trehalose, a disaccharide that serves as both a compatible solute and a carbon source. Increased trehalose in response to ethanol required the TreYZ trehalose biosynthetic enzymes, but not the TreS trehalose synthase. Ethanol induction of *treZ* gene expression and trehalose requires the sigma factor AlgU. AlgU was not activated by release from MucA, but rather in a manner dependent on (p)ppGpp. Ethanol caused a 2.5-fold

101 increase in (p)ppGpp levels, which was specifically dependent on SpoT (p)ppGpp synthase,  
 102 and the (p)ppGpp-binding protein DksA was required for ethanol-induced stimulation of *treZ*  
 103 gene expression and trehalose levels. Consistent with previous reports (41, 42),  
 104 acylhomoserine lactone-mediated (AHL) quorum sensing was also required for transcriptional  
 105 induction of the *treZ* gene by ethanol, as a  $\Delta lasR \Delta rhIR$  mutant defective in AHL-mediated  
 106 quorum sensing did not show increased trehalose levels in response to ethanol. The  
 107 stimulation of trehalose levels by salt did require AlgU, and trehalose stimulation in response to  
 108 salt was lower, but still occurred, in mutants lacking the factors necessary for the response to  
 109 ethanol. Analysis of genes differentially expressed when ethanol is in the growth medium,  
 110 performed using the eADAGE gene expression model constructed with data from over 1056  
 111 different samples (1), placed the *treYZ* genes among a cluster of co-regulated genes within the  
 112 AHL-controlled quorum sensing (QS) and AlgU regulons. Ethanol, even when added at the  
 113 time of culture inoculation, only stimulated AlgU-regulated genes and trehalose production in  
 114 cells during post-exponential phase, which is consistent with our model that regulators that  
 115 monitor growth and cell density cues are integrated into the *P. aeruginosa* response to ethanol.

## 116 **Materials and Methods**

117

### 118 **Strains and growth conditions**

119 Bacterial strains and plasmids used in this study are listed in Table S1. Bacteria were  
 120 maintained on 1.5% agar LB (lysogeny broth) plates (43). Where stated, ethanol (200-proof)  
 121 was added to the medium (liquid or molten agar) to a final concentration of 1% unless  
 122 otherwise stated. NaCl to a final concentration of 500 mM was added to liquid medium as  
 123 indicated. Mutants from the PA14 Non-Redundant (NR) Library were grown on LB with 60  
 124 µg/mL gentamicin (44). When strains from the NR library were used, the location of the  
 125 transposon insertion was confirmed using site-specific primers. The primers are listed in Table  
 126 S2. Where stated, LB medium was buffered to pH 8 with 100 mM HEPES buffer (referred to as  
 127 buffered LB). M63 medium contained 0.2% glucose and 2% casamino acids (45). When  
 128 ethanol was supplied as a sole carbon source, glucose and amino acids were omitted.  
 129 Planktonic cultures were grown at 37°C on a roller drum.

130

### 131 **Construction of in-frame deletions, complementation, and plasmids**

132 Construction of plasmids, including in-frame deletion and complementation constructs,  
 133 was completed using yeast cloning techniques in *Saccharomyces cerevisiae* as previously  
 134 described (46) unless otherwise stated. Primers used for plasmid construction are listed in  
 135 Table S2. In-frame deletion and single copy complementation constructs were made using the  
 136 allelic replacement vector pMQ30 (46). Deletions of *relA* and *spoT* were introduced in the  
 137 PA14 strain using the pEX18Gm suicide vector to create unmarked deletion mutants (47), as  
 138 previously described (48). Promoter fusion constructs were made using a modified pMQ30

vector with *lacZ-GFP* fusion integrating at the neutral *att* site on the chromosome.

The *rhII* promoter region was amplified from PA14 gDNA using the Phusion High-Fidelity DNA polymerase with primer tails homologous to the modified pMQ30 ATT KI vector containing the *lacZ-gfp* reporters. The 195 bp upstream promoter region includes a RhIR-binding site as annotated by pseudomonas.com at positions –192 to +3. All plasmids were purified from yeast using Zymoprep™ Yeast Plasmid Miniprep II according to manufacturer's protocol and transformed into electrocompetent *E. coli* strain S17 by electroporation. Plasmids were introduced into *P. aeruginosa* by conjugation and recombinants were obtained using sucrose counter-selection and genotype screening by PCR.

### ***P. aeruginosa* growth assays**

For growth curves shown in Figure S1, overnight cultures were diluted into 5 mL fresh buffered LB medium in 18x150 mm borosilicate glass tubes without or with 1% ethanol to an OD<sub>600nm</sub> of ~0.05 and incubated at 37°C on a roller drum. Similar culture vessels and volumes were used in all assays unless otherwise specified. OD<sub>600</sub> measurements were taken on a Genesys 6 spectrophotometer. For data in Figure S4, overnight cultures were diluted into fresh LB medium buffered to pH 8 with HEPES without or with 1% ethanol to an OD<sub>600</sub> of ~0.05 and 150 µl of the cell suspension was pipetted into 96-well plates. Plates were grown at 37°C with continuous shaking at ~150 rpm. OD<sub>600</sub> measurements were taken at 16 h of incubation using a microplate reader.

### **Microarray analysis**



Cultures of *P. aeruginosa* PA14 wild type were grown overnight in LB at 37°C on a roller drum. 5 µL of overnight culture were spotted onto T-broth plates (1.5% agar) (49) ± 1% ethanol. Plates were incubated at 37° for 16 h. Colonies were scraped up from the plates for RNA isolation using the Qiagen RNeasy Mini kit. The samples were DNase treated using the Invitrogen Turbo DNA-Free kit. As previously described (50), cDNAs labeled with biotin-ddUTP (Enzo Bio-Array terminal labeling kit, Affymetrix) were hybridized to *Pseudomonas* GeneChips using the GeneChip fluidics station 450 (Affymetrix) according to manufacturer’s instructions. GeneChips were scanned in the Dartmouth Genomics and Microarray Laboratory using the GeneChip Scanner 3000 7G (Affymetrix) and the BioConductor Affy library was used to read CEL file data. Data were normalized with RMA in BioConductor (51).

## **eADAGE analysis**

Genes upregulated 2-fold or more were analyzed within the context of their expression patterns in a compendium of 1051 publicly available microarrays from the Gene Expression Omnibus as determined by a machine learning model, eADAGE (1). Pearson correlations greater than 0.5 between the learnt parameters corresponding to each gene were visualized by edge weights in the resultant network (52). Genes differentially expressed between a wild type and  $\Delta lasR\Delta rhIR$  mutant strain sampled at different time points over the course of growth are referred to as the quorum sensing (QS)-controlled regulon (41) (Table S3D). The QS-controlled genes are presented as a network, plotted using the Fruchterman-Reingold force-directed algorithm, in which correlations in gene expression were indicated with the presence of edges and genes with shorter edges are more strongly correlated in expression pattern. The network was generated in R using the “network” (53, 54), “GGally” (55) and “ggplot2” (56)

packages. The genes within the QS-controlled gene set that were also differentially expressed upon deletion of *algU* (57) were indicated as green nodes and genes within the QS-controlled gene set that were also differentially expressed upon deletion of *rpoS* (42) (Table S3E) are indicated as pink nodes. QS-controlled genes that were not also differentially expressed upon deletion of AlgU or RpoS are presented as blue nodes. The complete gene lists for each data set and accompanying R code are available as a supplemental file. If necessary, PA14 gene numbers were converted to PAO1 ortholog gene numbers, and PAO1 gene numbers were converted to gene names, using *Pseudomonas aeruginosa* PA14 109 orthologs and *Pseudomonas aeruginosa* PAO1 107 annotations from [www.pseudomonas.com](http://www.pseudomonas.com) (58).

## Quantitative PCR analysis of transcripts

For quantitative real-time PCR experiments, cultures of indicated strains of *P. aeruginosa* were grown for 16 h in 5 mL of buffered LB at 37°C on a roller drum. RNA was isolated from planktonic cultures using the Qiagen RNeasy Mini kit. The samples were DNase-treated using the Invitrogen Turbo DNA-Free kit. cDNA was synthesized using the RevertAid H-minus first-strand synthesis kit using the GC-rich protocol with the following temperatures: 25°C for 5 minutes, 50°C for 60 minutes, and 70°C for 5 minutes. Synthesized cDNA was diluted 1:5 in molecular grade water and stored at -20°C. Quantitative PCR expression analysis was performed using an Applied Biosystems 7500 Real-Time PCR system with BioRad SsoFast Evagreen Supermix and primers listed in Table S2. A cycling regimen of 95°C for 30 seconds; 39 cycles of 95°C for 10 seconds and 60°C for 5 seconds; and a final 65°C for 3 seconds was used. Experimental transcripts were normalized to the housekeeping gene *rpoD*.

207

## 208 **Measurement of trehalose in cells**

209 Trehalose was quantified from whole cell lysates as described previously (59, 60) with  
 210 slight modifications. Briefly, bacterial cultures were grown for 16 h in LB or M63 medium  
 211 without or with 1% ethanol as stated, in 18mm borosilicate culture tubes at 37°C on a roller  
 212 drum. Cultures were inoculated from strains grown on LB plates. A 250 µL volume of culture  
 213 was concentrated to an OD<sub>600</sub> of 8.0 in sterile water. Cell suspensions were boiled for 10  
 214 minutes to lyse cells. The resulting lysate was centrifuged at 16,000 xg, and 100 µL aliquots of  
 215 lysate were transferred to new tubes. One tube of lysate was treated with 1 µL of trehalase  
 216 (Sigma-Aldrich) enzyme or vehicle control. Glucose in the lysate samples was quantified using  
 217 the glucose oxidase kit (Sigma; catalog no. GAGO20). Trehalose concentrations were  
 218 calculated based on a standard curve and subtraction of the basal glucose and expressed  
 219 relative to OD units.

220

## 221 **(p)ppGpp measurments**

222 Cultures inoculated at OD<sub>600</sub>= 0.05 were grown for 16 h to an OD<sub>600</sub>~2.0 in 5 mL M63  
 223 medium without and with 1% ethanol in 18 mm culture tubes at 37°C with 250 rpm shaking.  
 224 About 2 mL of cultures were pelleted at 10,000xg for 5 min and their (p)ppGpp was extracted  
 225 as described previously (61). Briefly, the pellets were suspended in 200 µL of 10 mM Tris-HCl  
 226 pH 7.8 containing 1 mg/mL lysozyme and 15 mM magnesium acetate. The suspensions were  
 227 vortexed for 3 s and subjected to two freeze-thawing cycles. Then, 15 µL of a 10%  
 228 deoxycholate solution was added and the suspensions were vortexed for 15 s. Finally, 200 µL  
 229 of 10 mM Tris-HCl pH 7.8 containing 15 mM magnesium acetate was added and the samples

were centrifuged at 12,000xg for 10 min. The supernatants were used for (p)ppGpp quantification, which was performed using the chemosensor Bis-Zn<sup>2+</sup>-dipicolylamine (PyDPA) as previously described (62). The measurements of (p)ppGpp-PyDPA complex were carried out immediately after the probe addition using fluorescence spectroscopy (Ex/Em= 344/480 nm) in a Tecan Infinite M1000 plate reader. To account for the interference of other nucleotides,  $\Delta relA\Delta spoT$  mutant extracts were used and the absolute (p)ppGpp values were determined using a calibration curve with purified (p)ppGpp (TriLink Biotechnologies) spanning a linear range of 0.4-6  $\mu$ M (p)ppGpp. For normalized (p)ppGpp measurements, fluorescence at Ex/Em 344/480 nm was normalized by the fluorescence at Ex/Em 344/380 nm (free nucleotides complex with PyDA) and by the OD<sub>600</sub> of the washed cultures.

## Measurement of $\beta$ -galactosidase in reporter fusion strains.

Cells with an *rhII* promoter fusion to *lacZ-GFP* genes integrated at the *attB* locus were grown in 2 mL of LB overnight culture grown at 37°C were pelleted, washed twice and re-suspended in PBS. The washed cells were diluted to a starting OD<sub>600</sub>=0.05 in 5 mL of M63 medium without and with 1% EtOH. After 16 h on a roller drum at 37°C,  $\beta$ -Galactosidase ( $\beta$ -Gal) activity was measured as described by Miller (63).

## Statistics

Unless otherwise stated, data are based on three biological replicates with the mean and standard deviations calculated, and are representative of at least three independent experiments containing multiple replicates. Unless stated otherwise, means and standard deviations were calculated in Graph Pad Prism 8 and analyses were completed using a two-

way ANOVA and Tukey's multiple comparisons test, with p-values indicated in figure legends. Regulon enrichments were determined by hypergeometric tests using the "phyper" function in the "stats" package in R.

## Accession Number

Data for our microarray analysis of *P. aeruginosa* PA14 wild type in response to ethanol has been uploaded to the GEO repository (<https://www.ncbi.nlm.nih.gov/geo/>) with the accession number GSE124852.

## Results

### Analysis of the transcriptome upon growth in the presence of ethanol

To examine the transcriptional response of *P. aeruginosa* to 1% ethanol, RNA from *P. aeruginosa* grown as colony biofilms for 16 h on tryptone agar  $\pm$ 1% ethanol was analyzed using *P. aeruginosa* Affymetrix GeneChips. Similar to published results (13), the presence of 1% ethanol in the medium did not affect the number of CFUs in colony biofilms (Fig. S1A).

Fifty-four transcripts were higher by two-fold or more in cells grown with ethanol, with an FDR-corrected p-value less than 0.05, and twenty genes were found to be lower by 2-fold or more in the presence of ethanol (Table S3A and B). Among the most differentially expressed genes were those involved in trehalose metabolism (*treZ* (3-fold), *treA* (2.1-fold) and *treS* (2.5-fold) (64). Other genes that were changed upon growth with ethanol are discussed in more detail below. To determine if ethanol also led to increased levels of trehalose, intracellular trehalose concentrations were measured in cells grown  $\pm$  ethanol in LB, a nutrient-rich medium, and M63, a defined medium. The LB was pH-buffered with HEPES because we observed that

ethanol led to a lower final pH in *P. aeruginosa* cultures grown with ethanol (final pH of 8.3 in control and pH 6.5 in ethanol from an initial pH of 7.1), despite similar growth kinetics (Fig. S1B), as has been described in *E. coli* (65) and *Acinetobacter baumannii* (19). Ethanol led to significant increases in trehalose in both buffered LB (>2-fold higher with ethanol) and in M63 (20-fold higher with ethanol).

### Increased trehalose in response to ethanol requires *treYZ* genes

In Pseudomonads such as *P. aeruginosa* and *Pseudomonas syringae*, trehalose can be synthesized by the TreYZ pathway, which converts glycogen to trehalose via a maltooligosyl trehalose synthase and glycosyl hydrolase (66), and by TreS, a trehalose synthetase that uses maltose as a substrate (Fig. 1A for schematic) (64, 67). Trehalose is degraded by the trehalase TreA; in other species, TreS also has trehalose catabolic activities (68, 69).

To determine which metabolic pathway was responsible for increased trehalose in cells grown with ethanol, we used mutants lacking the 6-gene operon (PA14\_36570-PA14\_36630) that contains *treY* and *treZ* genes (referred to here as *treYZ*<sup>-</sup> (64)), the 3-gene operon that contains *treS*<sup>-</sup> (referred to here as *treS*<sup>-</sup> (64)), and an insertional mutant of *treA* (44, 64). While *treS*<sup>-</sup> and *treA*::TnM both showed a marked increase in trehalose in the presence of ethanol in comparison to controls, the *treYZ*<sup>-</sup> strain did not, suggesting the increase in trehalose was by the TreYZ pathway (Fig. 1B). The significantly higher levels of trehalose in the *treS*<sup>-</sup> mutant in both control and ethanol conditions relative to the wild type suggested that the TreS catabolic activity was present under these conditions (70).

Ethanol catabolism occurs mainly by the pyrroloquinoline quinone (PQQ)-dependent alcohol dehydrogenase, ExaAB, and the resultant acetaldehyde is catabolized through a

pathway that includes acetyl-CoA synthetase (*AcsA*). We have shown previously that ethanol catabolic mutants (*exaA*, *pqqB*, and *acsA*) are defective in growth on ethanol as a carbon source (13). Ethanol catabolic mutants still showed a stimulation of trehalose production with ethanol in the growth medium (Fig. S2A).

Because we previously showed that ethanol (1%) led to increased production of the Pel exopolysaccharide through the diguanylate cyclase *WspR* (13), we determined if changes in trehalose occurred in response to changes in Pel production. We found that both the *pelA* and *wspR* mutants still had higher levels of trehalose in cells grown with ethanol (Fig. S2B) suggesting that changes in exopolysaccharide biosynthesis did not cause the increase in trehalose.

### **Ethanol induction of *treZ* gene expression and trehalose levels are dependent on AlgU**

Several lines of evidence led us to hypothesize that the alternative sigma factor AlgU controlled the induction of trehalose metabolic genes in response to ethanol. First, *treZ*, *treS*, and *treA* have been reported to be differentially expressed in *algU* mutant strains when compared to a wild-type strain in transcriptomics studies (57, 71). Second, *osmC* and *pfpl*, two well-characterized members of the AlgU regulon (71-73) were differentially expressed in our transcriptomics analysis of cells grown  $\pm 1\%$  ethanol (Table S3A).

In wild-type cells, qRT-PCR analysis found *treZ* to be 16-fold higher in cultures containing ethanol. In contrast, an in-frame  $\Delta algU$  mutant had no significant difference in *treZ* expression between cells growth with and without ethanol (Fig. 2A). Like *treZ*, the expression of another AlgU regulated gene *osmC* was higher (8-fold) upon growth with ethanol and, as expected, the differential expression was dependent on AlgU (Fig. 2B). The  $\Delta algU$  mutant also

did not show an increase in trehalose upon growth with ethanol (Fig. 2C), and its defect could be complemented by restoring *algU* to the native locus (Fig. 2C). While the sigma factor AlgU was required for the induction of *treZ* transcripts and trehalose production, a mutant lacking another sigma factor, RpoS, which has been shown to regulate trehalose levels in *E. coli* (74), did not differ from the wild-type in its response to ethanol (Fig. S3).

### **AlgU-dependent induction of trehalose in response to ethanol is independent of MucA cleavage and KinB regulation**

AlgU activity is repressed by the anti-sigma factor MucA, and proteolysis of MucA is a well characterized means by which AlgU and its homologs are activated (25, 72, 73, 75-79). MucA is bound by the periplasmic protein MucB, which inhibits MucA cleavage (80-82). Several stimuli, including high concentrations of ethanol (>3%) (27, 28) can lead to periplasmic stress and RpoE activation by anti-sigma factor degradation in other species. Several lines of evidence suggest that MucA cleavage was not the mechanism by which ethanol stimulated levels of *treZ* mRNA and trehalose. First, we found that ethanol increased trehalose to a similar extent in wild type and *mucB* mutant cells in strain PA14 background (Fig. 3A); the *mucB* mutant has decreased stability of MucA and the strain is mucoid, which indicates higher AlgU activation of genes involved in alginate biosynthesis. Second, ethanol stimulated trehalose levels in *P. aeruginosa* strain PAO1 in which *mucA* contained the *mucA22* mutation, which is found frequently among clinical isolates to an extent similar to that observed in the wild type. The truncated MucA22 mutant, a variant frequently found among *P. aeruginosa* clinical isolates, is no longer regulated by proteolysis and no longer represses AlgU (83, 84). Lastly, ethanol also stimulated trehalose in the alginate-overproducing mucoid cystic fibrosis



isolate FRD1 (85) which also has the *mucA22* allele (81, 86) (Fig. 3B). In FRD1, the stimulation of trehalose levels by ethanol required the presence of AlgU as the isogenic non-mucoid *algT/U::Tn501* (FRD440) derivative showed a large reduction in ethanol-stimulated trehalose (22) (Fig. 3C). These analyses showed that 1) ethanol induced responses similar to those in strain PA14 in genetically-distinct strains PAO1 and FRD1 and 2) that the increase in trehalose in response to ethanol is likely not due to the stimulation of MucA cleavage.

A *kinB* loss-of-function has been associated with increased AlgU activity (72, 73) due to increased activity of the AlgB transcription factor that stimulates AlgU expression; KinB phosphatase activity normally represses AlgB (87). Thus, we determined if KinB was required for the difference in trehalose levels in cells grown with or without ethanol. While the *kinB* mutant consistently had higher levels of trehalose in control and ethanol conditions compared to the wild type, KinB was not required for the effects of ethanol on trehalose levels (Fig. 3D). Together, these data support our model that AlgU regulates trehalose through a mechanism that is not dependent on KinB.

### **Ethanol stimulation of trehalose requires SpoT-generated ppGpp.**

In *E. coli*, the activity of RpoE, an AlgU homolog, is influenced by (p)ppGpp (35, 39, 40, 88, 89); (p)ppGpp effects on *P. aeruginosa* AlgU have not yet been reported. (p)ppGpp can be synthesized by either of two enzymes, RelA or SpoT (90-92). SpoT also has a (p)ppGpp degrading activity and, because very high levels of (p)ppGpp are toxic, mutants lacking *spoT* are only viable in the absence of RelA activity (93, 94). Thus, we determined if ethanol stimulation of trehalose levels was altered in either  $\Delta relA$  or  $\Delta relA \Delta spoT$  strains. We found that while the  $\Delta relA$  was like the wild type, ethanol did not influence trehalose levels in the

368  $\Delta relA \Delta spoT$  double mutant, suggesting that SpoT was required for trehalose accumulation in  
369 ethanol-grown cells (Fig. 4A). The induction of *treZ* and *osmC* were also dependent on SpoT  
370 (Fig. 4C and D).

371 To determine if 1% ethanol altered (p)ppGpp levels in PA14 wild type, its levels were  
372 measured. We found that cells grown with ethanol had 3.45-fold higher levels of (p)ppGpp.  
373 The increase in (p)ppGpp was similar to the wild type in the *relA* mutant, but the  $\Delta relA \Delta spoT$   
374 strain did not show an increase in (p)ppGpp in response to ethanol, indicating that ethanol  
375 stimulates (p)ppGpp production via SpoT (Fig. 4E).

376

### 377 **Ethanol stimulation of *treZ* and trehalose levels requires DksA**

378 The (p)ppGpp signal influences the activity of RNA polymerase-sigma factor complexes  
379 through DksA, an RNA polymerase-binding protein. We found that a  $\Delta dksA$  mutant no longer  
380 showed ethanol-induced trehalose accumulation and that the phenotype of the  $\Delta dksA$  mutant  
381 was complemented by restoring *dksA* at the native locus (Fig. 4B). Consistent with trehalose  
382 measurements, ethanol-induced increases in *treZ* and *osmC* expression were greatly reduced  
383 in  $\Delta relA \Delta spoT$  and  $\Delta dksA$  strains (Fig. 4C and D). Like the wild type, the growth kinetics of the  
384  $\Delta dksA$  mutant and  $\Delta relA \Delta spoT$  mutant were not reduced by 1% ethanol, though the  $\Delta dksA$   
385 mutant grew more slowly than the wild type in control conditions, consistent with published  
386 reports (95, 96) (Fig. S4).

387

### 388 **AlgU is required for, and SpoT and DksA contribute to, the induction of trehalose by** 389 **high salt**

In *P. aeruginosa* and other species, trehalose is induced by high salt (67, 97). Ausubel and colleagues (64) found that trehalose levels in high salt required TreYZ (64) and we confirmed these results (Fig. 5A and B). Furthermore, we found that trehalose induction in response to high salt was absent in the  $\Delta algU$  mutant (Fig. 5C) as it was for ethanol (Fig. 1C and D). While (p)ppGpp and DksA were necessary for any induction of trehalose in response to ethanol, the  $\Delta dksA$  and  $\Delta relA\Delta spoT$  strains still showed a significant induction of trehalose in response to salt (Fig. 5C). The level of induction, however, was significantly lower in the  $\Delta dksA$  and  $\Delta relA\Delta spoT$  strains compared to wild type and  $\Delta relA$  strain, suggesting that SpoT-dependent (p)ppGpp and the (p)ppGpp-responsive RNA polymerase binding protein DksA contributed to the response in cells from post-exponential phase cultures (Fig. 5C and D).

# **Quorum sensing master regulators are necessary for the ethanol induction of trehalose**

Schuster et al. (41, 42) found that *treZ* and other genes involved in trehalose biosynthesis and *osmC*, were at lower levels in a PAO1  $\Delta lasR\Delta rhIR$  mutant compared to the wild type. They reported that *treZ* and *osmC* fell within a subset of QS-controlled genes that were induced later in growth in batch culture relative to other QS-controlled genes (41, 42). We found that the increase in levels of *treZ* and *osmC* (Fig. 6A and B) or trehalose (Fig. 6C) in ethanol-grown cells did not occur in the  $\Delta lasR\Delta rhIR$  strain and that the lack of response was not due to ethanol effects on growth in this strain (Fig. S4). Since either *lasR*, *rhIR* or both AHL responsive transcription factors were necessary for the stimulation of trehalose in cells grown with ethanol, we determined if ethanol enhanced AHL-mediated quorum sensing thereby inducing trehalose levels. To do so, we monitored expression of *rhII*, a quorum sensing-controlled gene regulated by LasR and RhIR, using a *rhII-lacZ* promoter fusion (98). PA14 wild

type and the  $\Delta lasR\Delta rhIR$  strains were grown  $\pm$  ethanol. As expected, levels of  $\beta$ -galactosidase activity were much lower in the  $\Delta lasR\Delta rhIR$  mutant compared to the wild type and we found no significant difference in *rhII* promoter activity in ethanol-grown cells compared to cells from control conditions (Fig. 6D). The transcriptomics analysis of *P. aeruginosa* grown  $\pm$  ethanol above did not find evidence for ethanol affecting AHL-mediated quorum sensing broadly (Table S3A and B). Additionally, while AHL quorum sensing was required for trehalose accumulation in response to ethanol, it was not necessary for trehalose accumulation in response to high salt (Fig. 5E); there was, however, a significant reduction in trehalose levels in the  $\Delta lasR\Delta rhIR$ , compared to wild type in salt suggesting that this mechanism played a role.

# **Ethanol responsive genes comprise a distinct cluster within a structured network of QS-controlled genes also regulated by AlgU.**

Together, our data present a complex scheme in which global regulators, AlgU and transcription factors involved in AHL-mediated quorum sensing, control trehalose biosynthetic genes *treYZ* and *osmC* and levels of trehalose in cells grown with ethanol. Our findings support previous reports that separately found *treZ* and *osmC* genes to be among those genes controlled by AlgU (57, 71) and AHL-mediated quorum sensing (41, 42). To test the hypothesis that a subset of genes are members of both the AlgU and QS regulons, and that ethanol specifically altered expression of this subset of genes, we used eADAGE (ensemble Analysis using De-noising Auto-encoders of Gene Expression), a machine learning algorithm used to generate a model for *P. aeruginosa* expression patterns from 1051 publicly available transcriptome samples (1, 52, 99). The eADAGE model learned 600 expression signatures, and within each signature, genes have different weights. Similarities in weights across

signatures for genes indicate a correlation in expression levels. Pairwise Pearson correlation coefficients of the genes in the eADAGE model can be visualized as edge weights in a network where nodes are genes (adage.greenelab.com).

In the network shown in Figure 7, we present the relationships in expression patterns for 1) genes that were found to be differentially expressed in response to ethanol (nodes with orange borders) and 2) the set of genes differentially expressed by more than five-fold in a  $\Delta lasR\Delta rhIR$  strain compared to the wild type, which included *treZ* and *osmC*, reported in Schuster *et al.* (41) (blue nodes; gene list in Table S3D). Using a dataset that characterized the AlgU regulon by comparing an  $\Delta algU$  mutant to the wild type under AlgU-inducing heat shock conditions (57), we identified genes in the two datasets listed above that were regulated by AlgU (yellow nodes; Table S3C for gene list) or that were altered in both the  $\Delta lasR\Delta rhIR$  and  $\Delta algU$  strains (green nodes).

The majority of genes included in this network were connected by edges, revealing strongly correlated expression patterns across the large data compendium comprised of experiments performed by different labs with different strains and in different conditions over more than a decade (1, 52, 99). The connected genes fell into three major clusters (I, II, and III). The majority (80%) of the QS-controlled genes that were also AlgU-controlled (green nodes) (71) were found in cluster I. Ethanol-responsive transcripts (orange borders), including *treZ* and *osmC*, were exclusively localized to cluster I. Statistical analysis found that genes differentially expressed in response to ethanol (Table S3A) represented 12.2% of AlgU-controlled genes (57) and 8.6% of QS-controlled gene sets defined above (Table S3 for gene lists), but comprised 44% of genes present in both regulons. The enrichment of the intersection of AlgU and QS-controlled genes over the sets of either all AlgU- or all QS-regulated genes

was significant ( $p=0.001$ , and  $p=0.00002$ , respectively). Visualization of a cluster of ethanol-responsive genes within the gene-gene network comprised of the complete AlgU regulon (57) is shown in Figure S5.

Cluster II genes contained many genes known to be regulated mainly by LasR or RhIR, and their cognate signals (41, 42). Examples of genes in cluster II are *lasI*, *lasB*, *rhIR*, *rhII*, and *rhIA*. The lack of any of the ethanol-responsive genes in cluster II is consistent with our findings that ethanol did not alter expression of *rhII* (Fig. 6D) and is in support of our model that ethanol did not broadly induce the entire QS regulon.

Cluster III contained genes from the QS-controlled gene set that were previously described by Schuster (42) as also being differentially expressed in an *rpoS* mutant (pink nodes) (42) (Fig. 7 and Table S3E for gene list). Of the 56 genes in cluster III, 47 (42) and 29 (57) genes were differentially expressed in separate published studies describing the RpoS regulon. Ethanol-responsive genes were not among genes in cluster III, supporting above data showing that ethanol-induced trehalose levels were not dependent on *rpoS* (Fig. S3). Specific enrichment in AlgU and QS co-regulated genes among the genes upregulated in response to ethanol is consistent with ethanol activating only a subset of the AlgU and AHL-controlled regulons.

## **Ethanol induces trehalose after entry into post-exponential phase**

Increased trehalose levels and *osmC* and *treZ* transcripts in cultures with ethanol was dependent on both SpoT-synthesized (p)ppGpp and AHL-mediated quorum sensing, signals associated with growth restriction, often due to nutrient limitation, and high cell density, respectively. Analysis of trehalose levels in control and ethanol-containing cultures found that

482 ethanol only affected trehalose levels in cells from post-exponential phase cultures, but not  
 483 exponential phase cultures. This relationship was observed in both M63 medium (Fig. 8A) and  
 484 buffered LB medium (1.96  $\mu\text{g}/\text{OD}_{600}$  in control cultures vs 2.81  $\mu\text{g}/\text{OD}_{600}$  in ethanol-containing  
 485 cultures, p-value=0.1339). Expression of *treZ* was also not affected by ethanol in cells from  
 486 exponential phase cultures, but was in cells from the same cultures collected after entry into  
 487 post-exponential phase (Fig. 8B). Together, these data support a model in which the induction  
 488 of trehalose in response to ethanol by AlgU requires other signals from quorum sensing and  
 489 growth-restriction associated pathways.

490

491

## Discussion

The data presented above lead us to propose a model, based largely on genetic analyses, in which ethanol activates AlgU through stimulation of (p)ppGpp, synthesized by SpoT, and activation of DksA-dependent transcription. Chromatin immunoprecipitation experiments have shown that AlgU binds to the promoter for the *treYZ* containing operon (57). AHL-mediated quorum sensing, through LasR and/or RhIR was required for AlgU-dependent activation of *treZ* and *osmC* and increased levels of trehalose, and thus ethanol induction of trehalose was only observed in cultures after AHL-mediated QS was induced. Our data do not indicate that ethanol led to a global increase in expression of the QS regulon. Based on these data, we propose that even though ethanol was present over the course of growth, the increased trehalose biosynthesis in response to ethanol only occurs when cells have sensed a quorum and when (p)ppGpp synthesis can be stimulated, perhaps because of concomitant nutrient limitation signals which are known to activate SpoT (Fig. 9). These data highlight a nuanced response to a microbially-produced molecule, ethanol, in *P. aeruginosa* and this underscores how microbe-microbe interactions may change with shifts physiological states and extracellular signal concentrations.

The model for AlgU activation by (p)ppGpp and DksA represents a new mechanism by which the important sigma factor, AlgU, may be activated in *P. aeruginosa*. (p)ppGpp-dependent activation of *E. coli* RpoE, an AlgU homolog, has been reported previously (35) and has been associated with growth phase (100), but activation by non-inhibitory concentrations of ethanol has not been reported. Our data showed that ethanol, at a 1% concentration, did not activate AlgU through effects on MucA or MucB proteins (Fig. 3), which are targeted for cleavage in response to periplasmic or envelope stress. In the presence of 0.5 M salt, however, a stimulus



that is expected to induce periplasmic stress, DksA- and SpoT-independent stimulation of trehalose is observed, presumably because some AlgU activation occurred through MucA cleavage, but DksA and SpoT did contribute to the strength of the response suggesting that these mechanisms can work together.

The intersection of QS regulation and AlgU regulation is interesting. Future experiments will also determine if LasR and/or RhIR directly interact with the promoter upstream of the *treYZ* containing operon, and if that interaction only occurs when AlgU and DksA are complexed with RNA polymerase. Evidence for direct activation of *osmC* and *treYZ* expression is that overexpression of *lasR*, but not *rhIR*, is sufficient to induce expression of these genes (42). Our variable results with single mutants lacking either *lasR* or *rhIR* (data not shown) led us to propose that both transcription factors can influence the expression of *treYZ*, but with different kinetics, as has been shown for other genes (101). In separate studies with  $\Delta dksA$  and  $\Delta relA\Delta spoT$  mutants in strain PAO1, DksA and (p)ppGpp have independently been associated with both the positive and negative regulation of genes that are differentially expressed in a  $\Delta lasR\Delta rhIR$  mutant (96, 102-106) so there may be a complex relationship between these signaling pathways.

The biological role of AlgU-induced trehalose in *P. aeruginosa* in response to stresses or in microbial communities is not yet known. AlgU has been implicated in both the positive and negative regulation of genes involved in oxidative and osmotic stress responses in other Pseudomonads (107-110). For example, in different pathovars of *P. syringae*, AlgU regulates oxidative and osmotic stress response genes transcriptionally in response to osmotic stress (109) and contributes to plant disease independently of alginate (110). In *Pseudomonas fluorescens*, an *algU* mutant was significantly more sensitive to osmotic stress than wild type

(107). *P. fluorescens* AlgU to be necessary for desiccation stress tolerance, but dispensable for tolerance to 3% hydrogen peroxide, 1.9% paraquat, 5% sodium hypochlorite, heat shock, pH extremes, and the reducing agent dithiothreitol (107). In *P. aeruginosa*, AlgU has been described as having a negative role in oxidative stress resistance, can be protective against host innate immune factors through its regulation of alginate (25, 26). We did not observe a protective benefit of growth with 1% ethanol in oxidative stress, osmotic stress, and dessication assays in the growth conditions used in these studies (data not shown). Trehalose has been reported to protect against osmotic, oxidative, heat, and cold stress by stabilizing proteins and reducing formation of denatured protein aggregates (111-115), as a carbon reserve (111, 116), and recent studies have found that trehalose can stabilize outer membrane vesicles (117). Trehalose can accumulate in the cytoplasm and periplasm and be secreted, making it an interesting molecule to consider in the context of microbe-microbe interactions. *P. syringae* survival as an epiphyte and *P. aeruginosa* plant pathogenesis both require the ability to make trehalose (64, 118). Interestingly, exogenous trehalose and wild type-derived trehalose in co-culture rescued the attenuated trehalose mutant phenotype in *P. aeruginosa Arabidopsis* pathogenicity *in planta*, with the requirement for trehalose being independent of osmoprotection (64). Pseudomonads can accumulate a variety of osmoprotectants in addition to trehalose, including betaine, ectoine, and *N*-acetylglutaminyglutamine amide (NAGGN) (118). This redundancy may contribute to the fact that trehalose mutants are not more sensitive to tested stresses in laboratory assays (64).

In addition to *treZ* and other trehalose metabolism genes, cluster I included 38 genes found within the genome island that spans from PA2134 to PA2192 (PA14\_36980-PA14\_36345) (73, 119, 120). 16 of the 54 genes (~30%) differentially expressed in response

to ethanol were in this chromosomal region. Many of the genes in this chromosomal region that are differentially expressed in ethanol could participate in survival of stresses likely to be present in mixed-species communities formed with ethanol-producing microbes. For example, *glgE* is involved in the metabolism of glycogen, a carbon and energy storage molecule that accumulates when carbon is in excess relative to other growth-limiting nutrients (121). Other genes within this genome island encode putative ion transporters, double strand break repair enzymes, and two catalases. Other ethanol-induced genes within Cluster I included *osmC*, *sprP*, and *pfpl*. OsmC can be protective against oxidative stress caused by exposure to elevated osmolarity and hyperoxides through an unknown mechanism (122). SprP is a subtilase protease (123) and *pfpl* codes for a protease that plays a role in DNA protection in non-stress conditions and in the presence of hydrogen peroxide (124). Mutation of either *sprR* or *pfpl* in *P. aeruginosa* has pleiotropic effects (123, 124).

The important next question is the mechanism by which ethanol stimulates (p)ppGpp. Others have shown that (p)ppGpp levels increase in response to higher concentrations of ethanol, and, in *E. coli*, the addition of ethanol mimics amino acid starvation (125). They speculated that ethanol (and other short-chain alcohols) may interfere with amino acid uptake (125). Ethanol may also directly impact ribosome activity (126) or other pathways through effects on cell membranes, and the fact that responses vary based on growth phase provides a useful tool to understand how ethanol and ethanol-producing microbes influence the other bacteria.

## Acknowledgements

Research reported in this publication was supported by National Institutes of Health (NIH) grant R01 GM108492 to D.A.H., NIAID T32AI007519 to C.E.H. and D.L.M, NIGMS T32-GM008704-16 to G.D., NHLBI T32HL134598-01 to M.E.C., Burroughs Wellcome Fund award to D.N., Canadian Institutes of Health Research fellowship to D.M.. Microarray processing was carried out at Dartmouth Medical School in the Genomics Shared Resource Core, which was established by equipment grants from the NIH and NSF and is supported in part by a Cancer Center Core Grant (P30CA023108) from the National Cancer Institute. Support for the project was also provided by the NIGMS P20GM113132 through the Molecular Interactions and Imaging Core (MIIC). The content of this publication is solely the responsibility of the authors and does not necessarily represent the official views of the NIH.

We thank Carol Ringelberg (Geisel School of Medicine at Dartmouth) for Microarray data processing work. We also thank Fred Ausubel (Harvard Medical School), Daniel Wozniak (The Ohio State University College of Medicine), and Dennis Ohman (Virginia Commonwealth University School of Medicine) for generously providing strains. We also acknowledge Gary Heussler (UCSD Division of Biological Sciences) for providing plasmid and Jong-In Hong (Seoul National University) for providing the PyDPA probe.

## References

1. Tan J, Doing G, Lewis KA, Price CE, Chen KM, Cady KC, Perchuk B, Laub MT, Hogan DA, Greene CS. 2017. Unsupervised Extraction of Stable Expression Signatures from Public Compendia with an Ensemble of Neural Networks. *Cell Syst* 5:63-71 e6.
2. Acosta N, Whelan FJ, Somayaji R, Poonja A, Surette MG, Rabin HR, Parkins MD. 2017. The evolving cystic fibrosis microbiome: A comparative cohort study spanning 16 years. *Ann Am Thorac Soc* 14:1288-1297.
3. Willger SD, Grim SL, Dolben EL, Shipunova A, Hampton TH, Morrison HG, Filkins LM, O'Toole GA, Moulton LA, Ashare A, Sogin ML, Hogan DA. 2014. Characterization and quantification of the fungal microbiome in serial samples from individuals with cystic fibrosis. *Microbiome* 2:40.
4. Hogan DA, Willger SD, Dolben EL, Hampton TH, Stanton BA, Morrison HG, Sogin ML, Czum J, Ashare A. 2016. Analysis of lung microbiota in bronchoalveolar lavage, protected brush and sputum samples from subjects with mild-to-moderate cystic fibrosis lung disease. *PLoS One* 11:e0149998.
5. Delhaes L, Monchy S, Frealle E, Hubans C, Salleron J, Leroy S, Prevotat A, Wallet F, Wallaert B, Dei-Cas E, Sime-Ngando T, Chabe M, Viscogliosi E. 2012. The airway microbiota in cystic fibrosis: a complex fungal and bacterial community--implications for therapeutic management. *PLoS One* 7:e36313.
6. Parkins MD, Floto RA. 2015. Emerging bacterial pathogens and changing concepts of bacterial pathogenesis in cystic fibrosis. *J Cyst Fibros* 14:293-304.

7. Bos LD, Meinardi S, Blake D, Whiteson K. 2016. Bacteria in the airways of patients with cystic fibrosis are genetically capable of producing VOCs in breath. *J Breath Res* 10:047103.
8. Phan J, Meinardi S, Barletta B, Blake DR, Whiteson K. 2017. Stable isotope profiles reveal active production of VOCs from human-associated microbes. *J Breath Res* 11:017101.
9. Montuschi P, Paris D, Melck D, Lucidi V, Ciabattini G, Raia V, Calabrese C, Bush A, Barnes PJ, Motta A. 2012. NMR spectroscopy metabolomic profiling of exhaled breath condensate in patients with stable and unstable cystic fibrosis. *Thorax* 67:222-8.
10. Jorgensen F, Bally M, Chapon-Herve V, Michel G, Lazdunski A, Williams P, Stewart GS. 1999. RpoS-dependent stress tolerance in *Pseudomonas aeruginosa*. *Microbiology* 145 ( Pt 4):835-44.
11. Funabashi H, Ishikawa M, Mie M, Takahashi F, Yanagida Y, Aizawa M, Kobatake E. 2005. Electrochemical evaluation of cellular physiological status under stress in *Escherichia coli* with the *rpoS-lacZ* reporter gene. *Biotechnol Bioeng* 90:509-15.
12. He MX, Wu B, Shui ZX, Hu QC, Wang WG, Tan FR, Tang XY, Zhu QL, Pan K, Li Q, Su XH. 2012. Transcriptome profiling of *Zymomonas mobilis* under ethanol stress. *Biotechnol Biofuels* 5:75.
13. Chen AI, Dolben EF, Okegbe C, Harty CE, Golub Y, Thao S, Ha DG, Willger SD, O'Toole GA, Harwood CS, Dietrich LE, Hogan DA. 2014. *Candida albicans* ethanol stimulates *Pseudomonas aeruginosa* WspR-controlled biofilm formation as part of a cyclic relationship involving phenazines. *PLoS Pathog* 10:e1004480.

- 654 14. Fletcher M. 1983. The Effects of Methanol, Ethanol, Propanol and Butanol on Bacterial  
655 Attachment to Surfaces. *Journal of General Microbiology* 129:633-641.
- 656 15. Morales DK, Grahl N, Okegbe C, Dietrich LE, Jacobs NJ, Hogan DA. 2013. Control of  
657 *Candida albicans* metabolism and biofilm formation by *Pseudomonas aeruginosa*  
658 phenazines. *MBio* 4:e00526-12.
- 659 16. Tashiro Y, Inagaki A, Ono K, Inaba T, Yawata Y, Uchiyama H, Nomura N. 2014. Low  
660 concentrations of ethanol stimulate biofilm and pellicle formation in *Pseudomonas*  
661 *aeruginosa*. *Biosci Biotechnol Biochem* 78:178-81.
- 662 17. Smith MG, Des Etages SG, Snyder M. 2004. Microbial synergy via an ethanol-triggered  
663 pathway. *Mol Cell Biol* 24:3874-84.
- 664 18. Camarena L, Bruno V, Euskirchen G, Poggio S, Snyder M. 2010. Molecular  
665 mechanisms of ethanol-induced pathogenesis revealed by RNA-sequencing. *PLoS*  
666 *Pathog* 6:e1000834.
- 667 19. Nwugo CC, Arivett BA, Zimble DL, Gaddy JA, Richards AM, Actis LA. 2012. Effect of  
668 ethanol on differential protein production and expression of potential virulence functions  
669 in the opportunistic pathogen *Acinetobacter baumannii*. *PLoS One* 7:e51936.
- 670 20. Chatterjee I, Somerville GA, Heilmann C, Sahl HG, Maurer HH, Herrmann M. 2006.  
671 Very low ethanol concentrations affect the viability and growth recovery in post-  
672 stationary-phase *Staphylococcus aureus* populations. *Appl Environ Microbiol* 72:2627-  
673 36.
- 674 21. Fiester SE, Actis LA. 2013. Stress responses in the opportunistic pathogen  
675 *Acinetobacter baumannii*. *Future Microbiol* 8:353-65.

- 676 22. Flynn JL, Ohman DE. 1988. Cloning of genes from mucoid *Pseudomonas aeruginosa*  
677 which control spontaneous conversion to the alginate production phenotype. J Bacteriol  
678 170:1452-60.
- 679 23. Baynham PJ, Wozniak DJ. 1996. Identification and characterization of AlgZ, an AlgT-  
680 dependent DNA-binding protein required for *Pseudomonas aeruginosa* algD  
681 transcription. Mol Microbiol 22:97-108.
- 682 24. Martin DW, Schurr MJ, Yu H, Deretic V. 1994. Analysis of promoters controlled by the  
683 putative sigma factor AlgU regulating conversion to mucoidy in *Pseudomonas*  
684 *aeruginosa*: relationship to sigma E and stress response. J Bacteriol 176:6688-96.
- 685 25. Boucher JC, Martinez-Salazar J, Schurr MJ, Mudd MH, Yu H, Deretic V. 1996. Two  
686 distinct loci affecting conversion to mucoidy in *Pseudomonas aeruginosa* in cystic  
687 fibrosis encode homologs of the serine protease HtrA. J Bacteriol 178:511-23.
- 688 26. Malhotra S, Limoli DH, English AE, Parsek MR, Wozniak DJ. 2018. Mixed communities  
689 of mucoid and nonmucoid *Pseudomonas aeruginosa* exhibit enhanced resistance to  
690 host antimicrobials. MBio 9.
- 691 27. Kovacikova G, Skorupski K. 2002. The alternative sigma factor sigma E plays an  
692 important role in intestinal survival and virulence in *Vibrio cholerae*. Infect Immun  
693 70:5355-62.
- 694 28. Haines-Menges B, Whitaker WB, Boyd EF. 2014. Alternative sigma factor RpoE is  
695 important for *Vibrio parahaemolyticus* cell envelope stress response and intestinal  
696 colonization. Infect Immun 82:3667-77.
- 697 29. Rezuchova B, Homerova D, Sevcikova B, Novakova R, Feckova L, Roberts M,  
698 Kormanec J. 2013. Phenotypic analysis of *Salmonella enterica* serovar *Typhimurium*



- 699 *rpoE* mutants encoding RNA polymerase extracytoplasmic stress response sigma  
700 factors sigma E with altered promoter specificity. Arch Microbiol 195:27-36.
- 701 30. Palonen E, Lindstrom M, Somervuo P, Korkeala H. 2013. Alternative sigma factor  
702 sigmaE has an important role in stress tolerance of *Yersinia pseudotuberculosis*  
703 IP32953. Appl Environ Microbiol 79:5970-7.
- 704 31. Mishra MN, Kumar S, Gupta N, Kaur S, Gupta A, Tripathi AK. 2011. An  
705 extracytoplasmic function sigma factor cotranscribed with its cognate anti-sigma factor  
706 confers tolerance to NaCl, ethanol and methylene blue in *Azospirillum brasilense* Sp7.  
707 Microbiology 157:988-99.
- 708 32. Bordes P, Lavatine L, Phok K, Barriot R, Boulanger A, Castanie-Cornet MP, Dejean G,  
709 Lauber E, Becker A, Arlat M, Gutierrez C. 2011. Insights into the extracytoplasmic  
710 stress response of *Xanthomonas campestris* pv. *campestris*: role and regulation of  
711 sigma E-dependent activity. J Bacteriol 193:246-64.
- 712 33. Boucher JC, Yu H, Mudd MH, Deretic V. 1997. Mucoid *Pseudomonas aeruginosa* in  
713 cystic fibrosis: characterization of muc mutations in clinical isolates and analysis of  
714 clearance in a mouse model of respiratory infection. Infect Immun 65:3838-46.
- 715 34. Govan JR, Deretic V. 1996. Microbial pathogenesis in cystic fibrosis: mucoid  
716 *Pseudomonas aeruginosa* and *Burkholderia cepacia*. Microbiol Rev 60:539-74.
- 717 35. Costanzo A, Nicoloff H, Barchinger SE, Banta AB, Gourse RL, Ades SE. 2008. ppGpp  
718 and DksA likely regulate the activity of the extracytoplasmic stress factor sigma E in  
719 *Escherichia coli* by both direct and indirect mechanisms. Mol Microbiol 67:619-32.

36. Amar A, Pezzoni M, Pizarro RA, Costa CS. 2018. New envelope stress factors involved in sigma(E) activation and conditional lethality of rpoE mutations in *Salmonella enterica*. Microbiology 164:1293-1307.
37. Xiao H, Kalman M, Ikehara K, Zemel S, Glaser G, Cashel M. 1991. Residual guanosine 3',5'-bispyrophosphate synthetic activity of relA null mutants can be eliminated by spoT null mutations. J Biol Chem 266:5980-90.
38. Cashel M, Kalbacher B. 1970. The control of ribonucleic acid synthesis in *Escherichia coli*. V. Characterization of a nucleotide associated with the stringent response. J Biol Chem 245:2309-18.
39. Paul BJ, Barker MM, Ross W, Schneider DA, Webb C, Foster JW, Gourse RL. 2004. DksA: a critical component of the transcription initiation machinery that potentiates the regulation of rRNA promoters by ppGpp and the initiating NTP. Cell 118:311-22.
40. Perederina A, Svetlov V, Vassilyeva MN, Tahirov TH, Yokoyama S, Artsimovitch I, Vassilyev DG. 2004. Regulation through the secondary channel--structural framework for ppGpp-DksA synergism during transcription. Cell 118:297-309.
41. Schuster M, Lostroh CP, Ogi T, Greenberg EP. 2003. Identification, timing, and signal specificity of *Pseudomonas aeruginosa* quorum-controlled genes: a transcriptome analysis. J Bacteriol 185:2066-79.
42. Schuster M, Greenberg EP. 2007. Early activation of quorum sensing in *Pseudomonas aeruginosa* reveals the architecture of a complex regulon. BMC Genomics 8:287.
43. Bertani G. 1951. Studies on lysogenesis. I. The mode of phage liberation by lysogenic *Escherichia coli*. J Bacteriol 62:293-300.

- 742 44. Liberati NT, Urbach JM, Miyata S, Lee DG, Drenkard E, Wu G, Villanueva J, Wei T,  
743 Ausubel FM. 2006. An ordered, nonredundant library of *Pseudomonas aeruginosa*  
744 strain PA14 transposon insertion mutants. Proc Natl Acad Sci U S A 103:2833-8.
- 745 45. Neidhardt FC, Bloch PL, Smith DF. 1974. Culture medium for *enterobacteria*. J Bacteriol  
746 119:736-47.
- 747 46. Shanks RM, Caiazza NC, Hinsä SM, Toutain CM, O'Toole GA. 2006. *Saccharomyces*  
748 *cerevisiae*-based molecular tool kit for manipulation of genes from gram-negative  
749 bacteria. Appl Environ Microbiol 72:5027-36.
- 750 47. Hoang TT, Karkhoff-Schweizer RR, Kutchma AJ, Schweizer HP. 1998. A broad-host-  
751 range Flp-FRT recombination system for site-specific excision of chromosomally-  
752 located DNA sequences: application for isolation of unmarked *Pseudomonas*  
753 *aeruginosa* mutants. Gene 212:77-86.
- 754 48. Nguyen D, Joshi-Datar A, Lepine F, Bauerle E, Olakanmi O, Beer K, McKay G, Siehnel  
755 R, Schafhauser J, Wang Y, Britigan BE, Singh PK. 2011. Active starvation responses  
756 mediate antibiotic tolerance in biofilms and nutrient-limited bacteria. Science 334:982-6.
- 757 49. Friedman L, Kolter R. 2004. Two genetic loci produce distinct carbohydrate-rich  
758 structural components of the *Pseudomonas aeruginosa* biofilm matrix. J Bacteriol  
759 186:4457-65.
- 760 50. Jackson AA, Gross MJ, Daniels EF, Hampton TH, Hammond JH, Vallet-Gely I, Dove SL,  
761 Stanton BA, Hogan DA. 2013. Anr and its activation by PlcH activity in *Pseudomonas*  
762 *aeruginosa* host colonization and virulence. J Bacteriol 195:3093-104.

763 51. Irizarry RA, Hobbs B, Collin F, Beazer-Barclay YD, Antonellis KJ, Scherf U, Speed TP.  
764 2003. Exploration, normalization, and summaries of high density oligonucleotide array  
765 probe level data. *Biostatistics* 4:249-64.

766 52. Tan J, Huyck M, Hu D, Zelaya RA, Hogan DA, Greene CS. 2017. ADAGE signature  
767 analysis: differential expression analysis with data-defined gene sets. *BMC*  
768 *Bioinformatics* 18:512.

769 53. C B. 2008. network: a Package for Managing Relational Data in R.

770 54. C B. 2015. *\_network: Classes for Relational Data\_*. The Statnet Project,

771 55. Barret Schloerke JC, Di Cook, Francois Briatte, Moritz Marbach, Edwin Thoen, Amos  
772 Elberg, Joseph Larmarange. 2018. *GGally: Extension to 'ggplot2'*,

773 56. Wickham H. 2016. *ggplot2: Elegant Graphics for Data Analysis*. Springer-Verlag New  
774 York.

775 57. Schulz S, Eckweiler D, Bielecka A, Nicolai T, Franke R, Dotsch A, Hornischer K,  
776 Bruchmann S, Duvel J, Haussler S. 2015. Elucidation of sigma factor-associated  
777 networks in *Pseudomonas aeruginosa* reveals a modular architecture with limited and  
778 function-specific crosstalk. *PLoS Pathog* 11:e1004744.

779 58. Winsor GL, Griffiths EJ, Lo R, Dhillon BK, Shay JA, Brinkman FS. 2016. Enhanced  
780 annotations and features for comparing thousands of *Pseudomonas* genomes in the  
781 *Pseudomonas* genome database. *Nucleic Acids Res* 44:D646-53.

782 59. d'Enfert C, Fontaine T. 1997. Molecular characterization of the *Aspergillus nidulans treA*  
783 gene encoding an acid trehalase required for growth on trehalose. *Mol Microbiol*  
784 24:203-16.

- 785 60. Puttikamonkul S, Willger SD, Grahl N, Perfect JR, Movahed N, Bothner B, Park S,  
786 Paderu P, Perlin DS, Cramer RA, Jr. 2010. Trehalose 6-phosphate phosphatase is  
787 required for cell wall integrity and fungal virulence but not trehalose biosynthesis in the  
788 human fungal pathogen *Aspergillus fumigatus*. Mol Microbiol 77:891-911.
- 789 61. Lagosky PA, Chang FN. 1978. The extraction of guanosine 5'-diphosphate, 3'-  
790 diphosphate (ppGpp) from *Escherichia coli* using low pH reagents: a reevaluation.  
791 Biochem Biophys Res Commun 84:1016-24.
- 792 62. Rhee HW, Lee CR, Cho SH, Song MR, Cashel M, Choy HE, Seok YJ, Hong JI. 2008.  
793 Selective fluorescent chemosensor for the bacterial alarmone (p)ppGpp. J Am Chem  
794 Soc 130:784-5.
- 795 63. Miller JH. 1992. A short course in bacterial genetics : a laboratory manual and  
796 handbook for *Escherichia coli* and related bacteria. Cold Spring Harbor Laboratory  
797 Press, Plainview, N.Y.
- 798 64. Djonovic S, Urbach JM, Drenkard E, Bush J, Feinbaum R, Ausubel JL, Traficante D,  
799 Risech M, Kocks C, Fischbach MA, Priebe GP, Ausubel FM. 2013. Trehalose  
800 biosynthesis promotes *Pseudomonas aeruginosa* pathogenicity in plants. PLoS Pathog  
801 9:e1003217.
- 802 65. Vulic M, Kolter R. 2002. Alcohol-induced delay of viability loss in stationary-phase  
803 cultures of *Escherichia coli*. J Bacteriol 184:2898-905.
- 804 66. Maruta K, Mitsuzumi H, Nakada T, Kubota M, Chaen H, Fukuda S, Sugimoto T,  
805 Kurimoto M. 1996. Cloning and sequencing of a cluster of genes encoding novel  
806 enzymes of trehalose biosynthesis from thermophilic archaebacterium *Sulfolobus*  
807 *acidocaldarius*. Biochim Biophys Acta 1291:177-81.

- 808 67. Freeman BC, Chen C, Beattie GA. 2010. Identification of the trehalose biosynthetic loci  
809 of *Pseudomonas syringae* and their contribution to fitness in the phyllosphere. Environ  
810 Microbiol 12:1486-97.
- 811 68. Wolf A, Kramer R, Morbach S. 2003. Three pathways for trehalose metabolism in  
812 *Corynebacterium glutamicum* ATCC13032 and their significance in response to osmotic  
813 stress. Mol Microbiol 49:1119-34.
- 814 69. Cardoso FS, Castro RF, Borges N, Santos H. 2007. Biochemical and genetic  
815 characterization of the pathways for trehalose metabolism in *Propionibacterium*  
816 *freudenreichii*, and their role in stress response. Microbiology 153:270-80.
- 817 70. Ruhel R, Kataria R, Choudhury B. 2013. Trends in bacterial trehalose metabolism and  
818 significant nodes of metabolic pathway in the direction of trehalose accumulation.  
819 Microb Biotechnol 6:493-502.
- 820 71. Tart AH, Wolfgang MC, Wozniak DJ. 2005. The alternative sigma factor AlgT represses  
821 *Pseudomonas aeruginosa* flagellum biosynthesis by inhibiting expression of *fleQ*. J  
822 Bacteriol 187:7955-62.
- 823 72. Damron FH, Qiu D, Yu HD. 2009. The *Pseudomonas aeruginosa* sensor kinase KinB  
824 negatively controls alginate production through AlgW-dependent MucA proteolysis. J  
825 Bacteriol 191:2285-95.
- 826 73. Damron FH, Owings JP, Okkotsu Y, Varga JJ, Schurr JR, Goldberg JB, Schurr MJ, Yu  
827 HD. 2012. Analysis of the *Pseudomonas aeruginosa* regulon controlled by the sensor  
828 kinase KinB and sigma factor RpoN. J Bacteriol 194:1317-30.

- 829 74. Hengge-Aronis R, Klein W, Lange R, Rimmele M, Boos W. 1991. Trehalose synthesis  
830 genes are controlled by the putative sigma factor encoded by *rpoS* and are involved in  
831 stationary-phase thermotolerance in *Escherichia coli*. J Bacteriol 173:7918-24.
- 832 75. Wood LF, Leech AJ, Ohman DE. 2006. Cell wall-inhibitory antibiotics activate the  
833 alginate biosynthesis operon in *Pseudomonas aeruginosa*: Roles of sigma (AlgT) and  
834 the AlgW and Prc proteases. Mol Microbiol 62:412-26.
- 835 76. Qiu D, Eisinger VM, Head NE, Pier GB, Yu HD. 2008. ClpXP proteases positively  
836 regulate alginate overexpression and mucoid conversion in *Pseudomonas aeruginosa*.  
837 Microbiology 154:2119-30.
- 838 77. Wood LF, Ohman DE. 2009. Use of cell wall stress to characterize sigma 22 (AlgT/U)  
839 activation by regulated proteolysis and its regulon in *Pseudomonas aeruginosa*. Mol  
840 Microbiol 72:183-201.
- 841 78. Damron FH, Yu HD. 2011. *Pseudomonas aeruginosa* MucD regulates the alginate  
842 pathway through activation of MucA degradation via MucP proteolytic activity. J  
843 Bacteriol 193:286-91.
- 844 79. Damron FH, Goldberg JB. 2012. Proteolytic regulation of alginate overproduction in  
845 *Pseudomonas aeruginosa*. Mol Microbiol 84:595-607.
- 846 80. Schurr MJ, Yu H, Martinez-Salazar JM, Boucher JC, Deretic V. 1996. Control of AlgU, a  
847 member of the sigma E-like family of stress sigma factors, by the negative regulators  
848 MucA and MucB and *Pseudomonas aeruginosa* conversion to mucoidy in cystic fibrosis.  
849 J Bacteriol 178:4997-5004.
- 850 81. Mathee K, McPherson CJ, Ohman DE. 1997. Posttranslational control of the *algT*  
851 (*algU*)-encoded sigma 22 for expression of the alginate regulon in *Pseudomonas*

- 852        *aeruginosa* and localization of its antagonist proteins MucA and MucB (AlgN). J
- 853        Bacteriol 179:3711-20.
- 854    82.    Cezairliyan BO, Sauer RT. 2009. Control of *Pseudomonas aeruginosa* AlgW protease
- 855        cleavage of MucA by peptide signals and MucB. Mol Microbiol 72:368-79.
- 856    83.    Martin DW, Schurr MJ, Mudd MH, Govan JR, Holloway BW, Deretic V. 1993.
- 857        Mechanism of conversion to mucoidy in *Pseudomonas aeruginosa* infecting cystic
- 858        fibrosis patients. Proc Natl Acad Sci U S A 90:8377-81.
- 859    84.    Rowen DW, Deretic V. 2000. Membrane-to-cytosol redistribution of ECF sigma factor
- 860        AlgU and conversion to mucoidy in *Pseudomonas aeruginosa* isolates from cystic
- 861        fibrosis patients. Mol Microbiol 36:314-27.
- 862    85.    Ohman DE, Chakrabarty AM. 1981. Genetic mapping of chromosomal determinants for
- 863        the production of the exopolysaccharide alginate in a *Pseudomonas aeruginosa* cystic
- 864        fibrosis isolate. Infect Immun 33:142-8.
- 865    86.    DeVries CA, Ohman DE. 1994. Mucoid-to-nonmucoid conversion in alginate-producing
- 866        *Pseudomonas aeruginosa* often results from spontaneous mutations in *algT*, encoding a
- 867        putative alternate sigma factor, and shows evidence for autoregulation. J Bacteriol
- 868        176:6677-87.
- 869    87.    Chand NS, Clatworthy AE, Hung DT. 2012. The two-component sensor KinB acts as a
- 870        phosphatase to regulate *Pseudomonas aeruginosa* Virulence. J Bacteriol 194:6537-47.
- 871    88.    Paul BJ, Berkmen MB, Gourse RL. 2005. DksA potentiates direct activation of amino
- 872        acid promoters by ppGpp. Proc Natl Acad Sci U S A 102:7823-8.



- 873 89. Mallik P, Paul BJ, Rutherford ST, Gourse RL, Osuna R. 2006. DksA is required for  
874 growth phase-dependent regulation, growth rate-dependent control, and stringent  
875 control of *fis* expression in *Escherichia coli*. J Bacteriol 188:5775-82.
- 876 90. Traxler MF, Summers SM, Nguyen HT, Zacharia VM, Hightower GA, Smith JT, Conway  
877 T. 2008. The global, ppGpp-mediated stringent response to amino acid starvation in  
878 *Escherichia coli*. Mol Microbiol 68:1128-48.
- 879 91. Wu J, Xie J. 2009. Magic spot: (p) ppGpp. J Cell Physiol 220:297-302.
- 880 92. Edwards AN, Patterson-Fortin LM, Vakulskas CA, Mercante JW, Potrykus K, Vinella D,  
881 Camacho MI, Fields JA, Thompson SA, Georgellis D, Cashel M, Babitzke P, Romeo T.  
882 2011. Circuitry linking the Csr and stringent response global regulatory systems. Mol  
883 Microbiol 80:1561-80.
- 884 93. Gentry DR, Cashel M. 1996. Mutational analysis of the *Escherichia coli spoT* gene  
885 identifies distinct but overlapping regions involved in ppGpp synthesis and degradation.  
886 Mol Microbiol 19:1373-84.
- 887 94. Montero M, Rahimpour M, Viale AM, Almagro G, Eydallin G, Sevilla A, Canovas M,  
888 Bernal C, Lozano AB, Munoz FJ, Baroja-Fernandez E, Bahaji A, Mori H, Codoner FM,  
889 Pozueta-Romero J. 2014. Systematic production of inactivating and non-inactivating  
890 suppressor mutations at the *relA* locus that compensate the detrimental effects of  
891 complete *spoT* loss and affect glycogen content in *Escherichia coli*. PLoS One  
892 9:e106938.
- 893 95. Blaby-Haas CE, Furman R, Rodionov DA, Artsimovitch I, de Crecy-Lagard V. 2011.  
894 Role of a Zn-independent DksA in Zn homeostasis and stringent response. Mol  
895 Microbiol 79:700-15.

- 896 96. Jude F, Kohler T, Branny P, Perron K, Mayer MP, Comte R, van Delden C. 2003.  
897 Posttranscriptional control of quorum-sensing-dependent virulence genes by DksA in  
898 *Pseudomonas aeruginosa*. J Bacteriol 185:3558-66.
- 899 97. D'Souza-Ault MR, Smith LT, Smith GM. 1993. Roles of N-acetylglutaminylglutamine  
900 amide and glycine betaine in adaptation of *Pseudomonas aeruginosa* to osmotic stress.  
901 Appl Environ Microbiol 59:473-8.
- 902 98. de Kievit TR, Kakai Y, Register JK, Pesci EC, Iglewski BH. 2002. Role of the  
903 *Pseudomonas aeruginosa* Las and Rhl quorum-sensing systems in RhlI regulation.  
904 FEMS Microbiol Lett 212:101-6.
- 905 99. Tan J, Hammond JH, Hogan DA, Greene CS. 2016. ADAGE-Based integration of  
906 publicly available *Pseudomonas aeruginosa* gene expression data with denoising  
907 autoencoders illuminates microbe-host interactions. mSystems 1.
- 908 100. Costanzo A, Ades SE. 2006. Growth phase-dependent regulation of the  
909 extracytoplasmic stress factor, sigma E, by guanosine 3',5'-bispyrophosphate (ppGpp).  
910 J Bacteriol 188:4627-34.
- 911 101. Cugini C, Morales DK, Hogan DA. 2010. *Candida albicans*-produced farnesol stimulates  
912 *Pseudomonas* quinolone signal production in LasR-defective *Pseudomonas aeruginosa*  
913 strains. Microbiology 156:3096-107.
- 914 102. Schafhauser J, Lepine F, McKay G, Ahlgren HG, Khakimova M, Nguyen D. 2014. The  
915 stringent response modulates 4-hydroxy-2-alkylquinoline biosynthesis and quorum-  
916 sensing hierarchy in *Pseudomonas aeruginosa*. J Bacteriol 196:1641-50.

- 917 103. Xu X, Yu H, Zhang D, Xiong J, Qiu J, Xin R, He X, Sheng H, Cai W, Jiang L, Zhang K,  
918 Hu X. 2016. Role of ppGpp in *Pseudomonas aeruginosa* acute pulmonary infection and  
919 virulence regulation. Microbiol Res 192:84-95.
- 920 104. Erickson DL, Lines JL, Pesci EC, Venturi V, Storey DG. 2004. *Pseudomonas*  
921 *aeruginosa* *relA* contributes to virulence in *Drosophila melanogaster*. Infect Immun  
922 72:5638-45.
- 923 105. Baysse C, Cullinane M, Denervaud V, Burrowes E, Dow JM, Morrissey JP, Tam L,  
924 Trevors JT, O'Gara F. 2005. Modulation of quorum sensing in *Pseudomonas*  
925 *aeruginosa* through alteration of membrane properties. Microbiology 151:2529-42.
- 926 106. Branny P, Pearson JP, Pesci EC, Kohler T, Iglewski BH, Van Delden C. 2001. Inhibition  
927 of quorum sensing by a *Pseudomonas aeruginosa* D  
928 DksA homologue. J Bacteriol 183:1531-9.
- 929 107. Schnider-Keel U, Lejbolle KB, Baehler E, Haas D, Keel C. 2001. The sigma factor AlgU  
930 (AlgT) controls exopolysaccharide production and tolerance towards desiccation and  
931 osmotic stress in the biocontrol agent *Pseudomonas fluorescens* CHA0. Appl Environ  
932 Microbiol 67:5683-93.
- 933 108. Freeman BC, Chen C, Yu X, Nielsen L, Peterson K, Beattie GA. 2013. Physiological  
934 and transcriptional responses to osmotic stress of two *Pseudomonas syringae* strains  
935 that differ in epiphytic fitness and osmotolerance. J Bacteriol 195:4742-52.
- 936 109. Yu X, Lund SP, Greenwald JW, Records AH, Scott RA, Nettleton D, Lindow SE, Gross  
937 DC, Beattie GA. 2014. Transcriptional analysis of the global regulatory networks active  
938 in *Pseudomonas syringae* during leaf colonization. MBio 5:e01683-14.

- 939 110. Markel E, Stodghill P, Bao Z, Myers CR, Swingle B. 2016. AlgU Controls Expression of  
940 Virulence Genes in *Pseudomonas syringae* pv. *tomato* DC3000. J Bacteriol 198:2330-  
941 44.
- 942 111. Elbein AD, Pan YT, Pastuszak I, Carroll D. 2003. New insights on trehalose: a  
943 multifunctional molecule. Glycobiology 13:17R-27R.
- 944 112. De Virgilio C, Hottiger T, Dominguez J, Boller T, Wiemken A. 1994. The role of  
945 trehalose synthesis for the acquisition of thermotolerance in yeast. I. Genetic evidence  
946 that trehalose is a thermoprotectant. Eur J Biochem 219:179-86.
- 947 113. Hottiger T, De Virgilio C, Hall MN, Boller T, Wiemken A. 1994. The role of trehalose  
948 synthesis for the acquisition of thermotolerance in yeast. II. Physiological concentrations  
949 of trehalose increase the thermal stability of proteins in vitro. Eur J Biochem 219:187-93.
- 950 114. Kandror O, DeLeon A, Goldberg AL. 2002. Trehalose synthesis is induced upon  
951 exposure of *Escherichia coli* to cold and is essential for viability at low temperatures.  
952 Proc Natl Acad Sci U S A 99:9727-32.
- 953 115. Singer MA, Lindquist S. 1998. Thermotolerance in *Saccharomyces cerevisiae*: the Yin  
954 and Yang of trehalose. Trends Biotechnol 16:460-8.
- 955 116. Thammahong A, Puttikamonkul S, Perfect JR, Brennan RG, Cramer RA. 2017. Central  
956 role of the trehalose biosynthesis pathway in the pathogenesis of human fungal  
957 infections: opportunities and challenges for therapeutic development. Microbiol Mol Biol  
958 Rev 81.
- 959 117. Bosch S, de Beaurepaire L, Allard M, Mosser M, Heichette C, Chretien D, Jegou D,  
960 Bach JM. 2016. Trehalose prevents aggregation of exosomes and cryodamage. Sci  
961 Rep 6:36162.

- 962 118. Kurz M, Burch AY, Seip B, Lindow SE, Gross H. 2010. Genome-driven investigation of  
963 compatible solute biosynthesis pathways of *Pseudomonas syringae* pv. *syringae* and  
964 their contribution to water stress tolerance. Appl Environ Microbiol 76:5452-62.
- 965 119. Waite RD, Papakonstantinou A, Littler E, Curtis MA. 2005. Transcriptome analysis  
966 of *Pseudomonas aeruginosa* growth: comparison of gene expression in planktonic  
967 cultures and developing and mature biofilms. J Bacteriol 187:6571-6.
- 968 120. Waite RD, Paccanaro A, Papakonstantinou A, Hurst JM, Saqi M, Littler E, Curtis  
969 MA. 2006. Clustering of *Pseudomonas aeruginosa* transcriptomes from planktonic  
970 cultures, developing and mature biofilms reveals distinct expression profiles. BMC  
971 Genomics 7:162.
- 972 121. Chandra G, Chater KF, Bornemann S. 2011. Unexpected and widespread connections  
973 between bacterial glycogen and trehalose metabolism. Microbiology 157:1565-72.
- 974 122. Park SC, Pham BP, Van Duyet L, Jia B, Lee S, Yu R, Han SW, Yang JK, Hahm KS,  
975 Cheong GW. 2008. Structural and functional characterization of osmotically inducible  
976 protein C (OsmC) from *Thermococcus kodakaraensis* KOD1. Biochim Biophys Acta  
977 1784:783-8.
- 978 123. Pelzer A, Polen T, Funken H, Rosenau F, Wilhelm S, Bott M, Jaeger KE. 2014.  
979 Subtilase SprP exerts pleiotropic effects in *Pseudomonas aeruginosa*.  
980 Microbiologyopen 3:89-103.
- 981 124. Rodriguez-Rojas A, Blazquez J. 2009. The *Pseudomonas aeruginosa* pfpl gene plays  
982 an antimutator role and provides general stress protection. J Bacteriol 191:844-50.

125. Mitchell JJ, Lucas-Lenard JM. 1980. The effect of alcohols on guanosine 5'-diphosphate-3'-diphosphate metabolism in stringent and relaxed *Escherichia coli*. J Biol Chem 255:6307-13.
126. Haft RJ, Keating DH, Schwaegler T, Schwalbach MS, Vinokur J, Tremaine M, Peters JM, Kotlajich MV, Pohlmann EL, Ong IM, Grass JA, Kiley PJ, Landick R. 2014. Correcting direct effects of ethanol on translation and transcription machinery confers ethanol tolerance in bacteria. Proc Natl Acad Sci U S A 111:E2576-85.

## Figure Legends

Figure 1. Trehalose accumulation in response to ethanol requires *treYZ*. A. Schematic of trehalose biosynthetic pathways in *P. aeruginosa*. B. Trehalose levels in trehalose metabolic mutants grown in M63 medium without and with 1% ethanol for 16 hours. Data are representative of at least 3 independent experiments with 3 biological replicates each. a-b, a-c, a-d, b-c, c-d  $p < 0.0001$ ; b-d  $p < 0.02$  based on two-way ANOVA and Tukey's multiple comparisons test.

Figure 2. Analysis of the effects of ethanol on *treZ* and *osmC* transcript levels and intracellular trehalose in *P. aeruginosa* wild type and  $\Delta algU$ . A and B. *treZ* (A) and *osmC* (B) transcript levels relative to *rpoD* after growth in the absence and presence of 1% ethanol in buffered LB for 16 hours a-b  $p < 0.0001$  two-way ANOVA and Tukey's multiple comparisons test. C and D. Trehalose levels in wild type,  $\Delta algU$ , and  $\Delta algU + algU$  at the native locus in buffered LB (C) and M63 medium (D) without and with 1% ethanol for 16 hours. a-b  $p < 0.002$ ; a-c  $p < 0.0009$ ; b-

1006 c NS (C) a-b  $p < 0.0001$  (D) based on two-way ANOVA and Tukey's multiple comparisons test.  
 1007 Data are representative of at least three independent experiments, each with at least three  
 1008 biological replicates.  
 1009  
 1010 Figure 3. Trehalose levels in response to ethanol are independent of MucB, MucA cleavage,  
 1011 and KinB. Trehalose levels of *A. P. aeruginosa* strain PA14 wild type and the validated *mucB*  
 1012 transposon mutant. B. *P. aeruginosa* strain PAO1 wild type and a *mucA* (MucA22) mutant, C.  
 1013 FRD1 and its isogenic *algU::Tn* derivative. D. *P. aeruginosa* strain PA14 wild type and the  
 1014  $\Delta kinB$  mutant. Cultures grown in M63 medium without and with 1% ethanol for 16 hours. Data  
 1015 are representative of at least 2 experiments, each with 3 biological replicates. Statistics based  
 1016 on two-way ANOVA and Tukey's multiple comparisons test \*\*\*  $p\text{-value} < 0.0001$ ; \*\*  $p \leq 0.0002$ .  
 1017  
 1018 Figure 4. *dksA* and *spoT* are required for trehalose accumulation, *treZ* and *osmC* expression,  
 1019 and increased (p)ppGpp in response to ethanol. Trehalose levels of A. PA14 wild type,  $\Delta relA$ ,  
 1020 and  $\Delta relA \Delta spoT$  and B. PA14 wild type,  $\Delta dksA$ , and  $\Delta dksA + dksA$  in M63 medium without  
 1021 and with 1% ethanol for 16 hours. C. *treZ* and D. *osmC* transcripts normalized to *rpoD* in PA14  
 1022 wild type,  $\Delta dksA$ , and  $\Delta relA spoT$  in buffered LB at 16 hours without and with 1% ethanol. A-D  
 1023 Data are representative of at least 3 independent experiments with at least 3 biological  
 1024 replicates each. E. (p)ppGpp quantification of PA14 WT,  $\Delta relA$ , and  $\Delta relA \Delta spoT$  in M63  
 1025 medium without and with 1% ethanol for 16 hours. Data are representative of at least 2  
 1026 independent experiments. Statistics based on two-way ANOVA and Tukey's multiple  
 1027 comparisons test. A. a-b  $p = 0.0179$ ; a-c, d-e  $p = 0.0001$ ; a-d, a-e, b-d, b-e, c-d, c-e  $p < 0.0001$ ; b-c  
 1028 = NS. B. a-b  $p < 0.0001$ . C. a-b, b-c  $p < 0.0001$ ; a-c  $p \leq 0.05$  D. a-b  $p < 0.0001$ . E. a-b  $p < 0.0001$ .

1029  
 1030 Figure 5. Trehalose accumulation in response to salt requires TreYZ and AlgU. A. 500 mM  
 1031 NaCl stimulates trehalose accumulation. B. Salt-stimulated accumulation of trehalose is  
 1032 dependent on the TreYZ pathway. C. Salt-stimulated trehalose accumulation requires *algU*  
 1033 and *dksA* and *spoT* contribute. D. Salt stimulated trehalose accumulation is independent of  
 1034 *relA*. E. Trehalose accumulation in salt is similar to wild type in  $\Delta lasR\Delta rhIR$ . Cultures were  
 1035 grown 16 hours in M63 medium with 1% ethanol or 500 mM NaCl as indicated. Data are  
 1036 representative of two or more experiments, each with at least 3 biological replicates. Statistics  
 1037 based on one-way ANOVA (A) or two-way ANOVA (B,C,D) and Tukey's multiple comparisons  
 1038 test. A. a-b p=0.0005; a-c, b-c p<0.0001. B. a-b, p<0.0001. C. a-b, a-c, a-d, b-c, p<0.0001. D.  
 1039 a-b, a-c, a-d, b-c, p<0.0001. E. a-b, a-c p<0.0001; b-c p=0.0007

1040  
 1041 Figure 6. AHL quorum sensing regulation is required for trehalose accumulation and increased  
 1042 *treZ* and *osmC* transcripts in response to ethanol. A. Expression of *treZ* and B. *osmC* genes  
 1043 normalized to *rpoD* in PA14 wild type and  $\Delta lasR\Delta rhIR$  in buffered LB without and with 1%  
 1044 ethanol for 16 hours. C. Trehalose quantification of PA14 wild type and  $\Delta lasR\Delta rhIR$  cells  
 1045 grown planktonically in M63 medium without and with 1% ethanol for 16 hours. D.  $\beta$ -  
 1046 galactosidase assay of *rhII-lacZ* promoter activity in PA14 wild type and  $\Delta lasR\Delta rhIR$  cells  
 1047 grown planktonically in M63 medium without and with 1% ethanol for 16 hours. Data are  
 1048 representative of at least 2 independent experiments, each with 3 or more biological replicates.  
 1049 Statistics based on two-way ANOVA and Tukey's multiple comparisons test. A. a-b, a-d, b-c, b-  
 1050 d p<0.0001; a-c p=0.0004; c-d p=0.0395 B. a-b, b-c p<0.0001; a-c p<0.02. C. a-b p=0.0002.

1051



Figure 7. Ethanol responsive genes are enriched for genes with overlapping AlgU and QS control. eADAGE gene-gene network analysis of ethanol responsive genes and QS regulon genes with overlapping AlgU genes indicated. I. Enrichment region for genes coordinately regulated by AlgU and QS (green) and ethanol responsive genes (orange outline). II. Enrichment region for “canonical” quorum sensing genes including *lasI*, *lasB*, *rhlR*, *rhlI*, and *rhlA*. III. Enrichment region for QS genes within the RpoS regulon.

Figure 8. Ethanol stimulates *treZ* gene expression and trehalose levels in cells from post-exponential phase but not exponential cultures. A. Trehalose quantification of cells grown in M63 medium without and with 1% ethanol for 6 hours to an OD<sub>600</sub> of ~1.0 (Exp.) or 16 hours (Post exp.). B. *treZ* gene expression normalized to *rpoD* in cultures grown in buffered LB without and with 1% ethanol to the same densities as in A. Data are representative of 3 experiments, each with 2-4 biological replicates. Statistics based on two-way ANOVA and Tukey’s multiple comparisons test. \*\*\*p≤0.0008.

Figure 9. Model describing ethanol stimulation of the AlgU regulon and trehalose production. Our data support a model wherein cell density and growth signals determine the cell’s response to ethanol. The colors of the text are reflected in the schematic of the transcriptional regulatory complex.

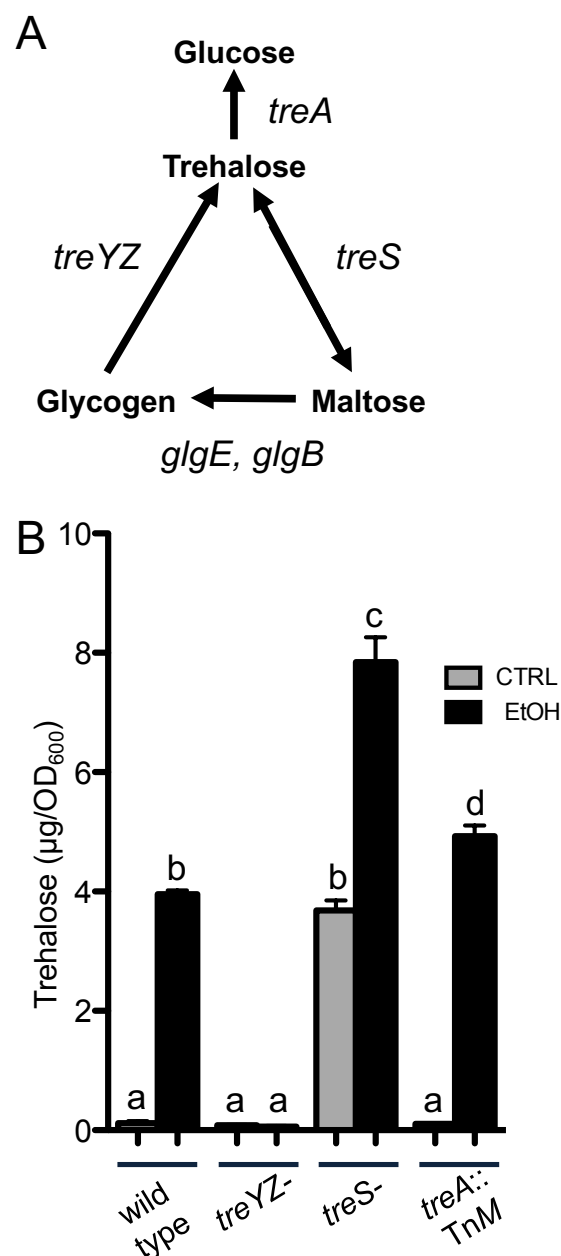

Figure 1. Trehalose accumulation in response to ethanol requires *treYZ*. A. Schematic of trehalose biosynthetic pathways in *P. aeruginosa*. B. Trehalose levels in trehalose metabolic mutants grown in M63 medium without and with 1% ethanol for 16 hours. Data are representative of at least 3 independent experiments with 3 biological replicates each. a-b, a-c, a-d, b-c, c-d  $p < 0.0001$ ; b-d  $p < 0.02$  based on two-way ANOVA and Tukey's multiple comparisons test.

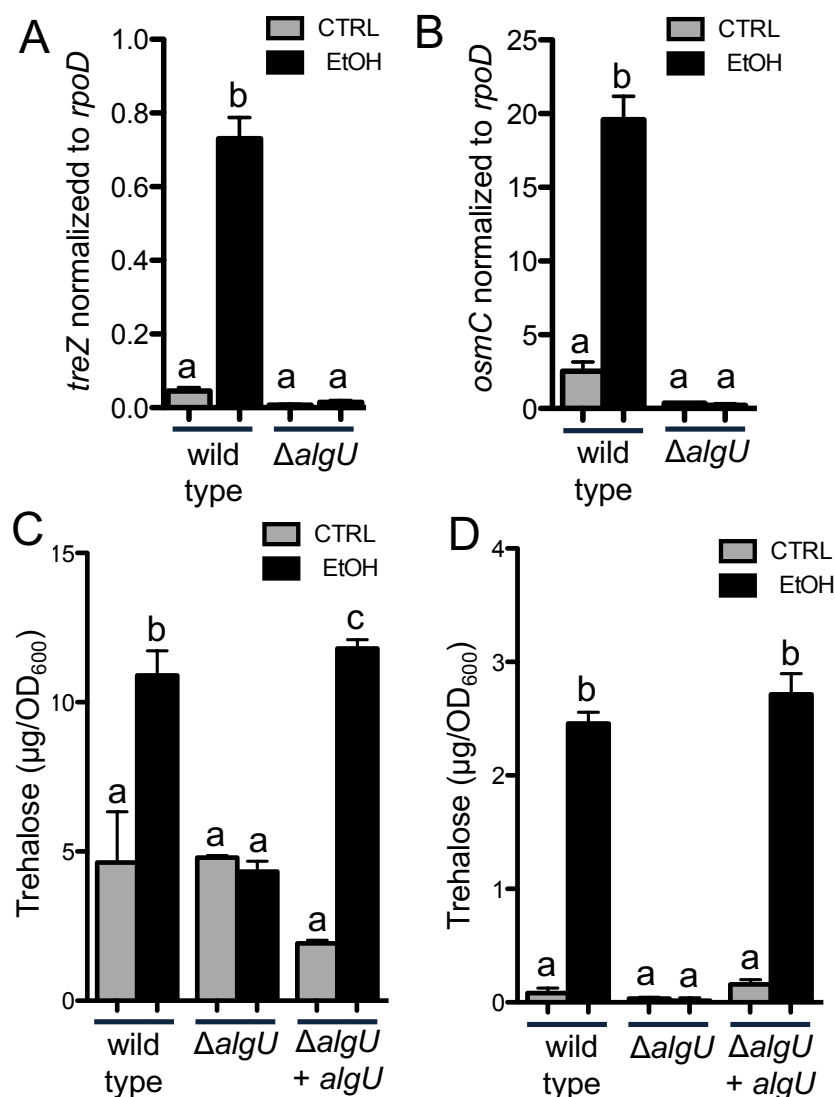

Figure 2. Analysis of the effects of ethanol on *treZ* and *osmC* transcript levels and intracellular trehalose in *P. aeruginosa* wild type and  $\Delta algU$ . A and B. *treZ* (A) and *osmC* (B) transcript levels relative to *rpoD* after growth in the absence and presence of 1% ethanol in buffered LB for 16 hours a-b  $p < 0.0001$  two-way ANOVA and Tukey's multiple comparisons test. C and D. Trehalose levels in wild type,  $\Delta algU$ , and  $\Delta algU + algU$  at the native locus in buffered LB (C) and M63 medium (D) without and with 1% ethanol for 16 hours. a-b  $p < 0.002$ ; a-c  $p < 0.0009$ ; b-c NS (C) a-b  $p < 0.0001$  (D) based on two-way ANOVA and Tukey's multiple comparisons test. Data are representative of at least three independent experiments, each with at least three biological replicates.

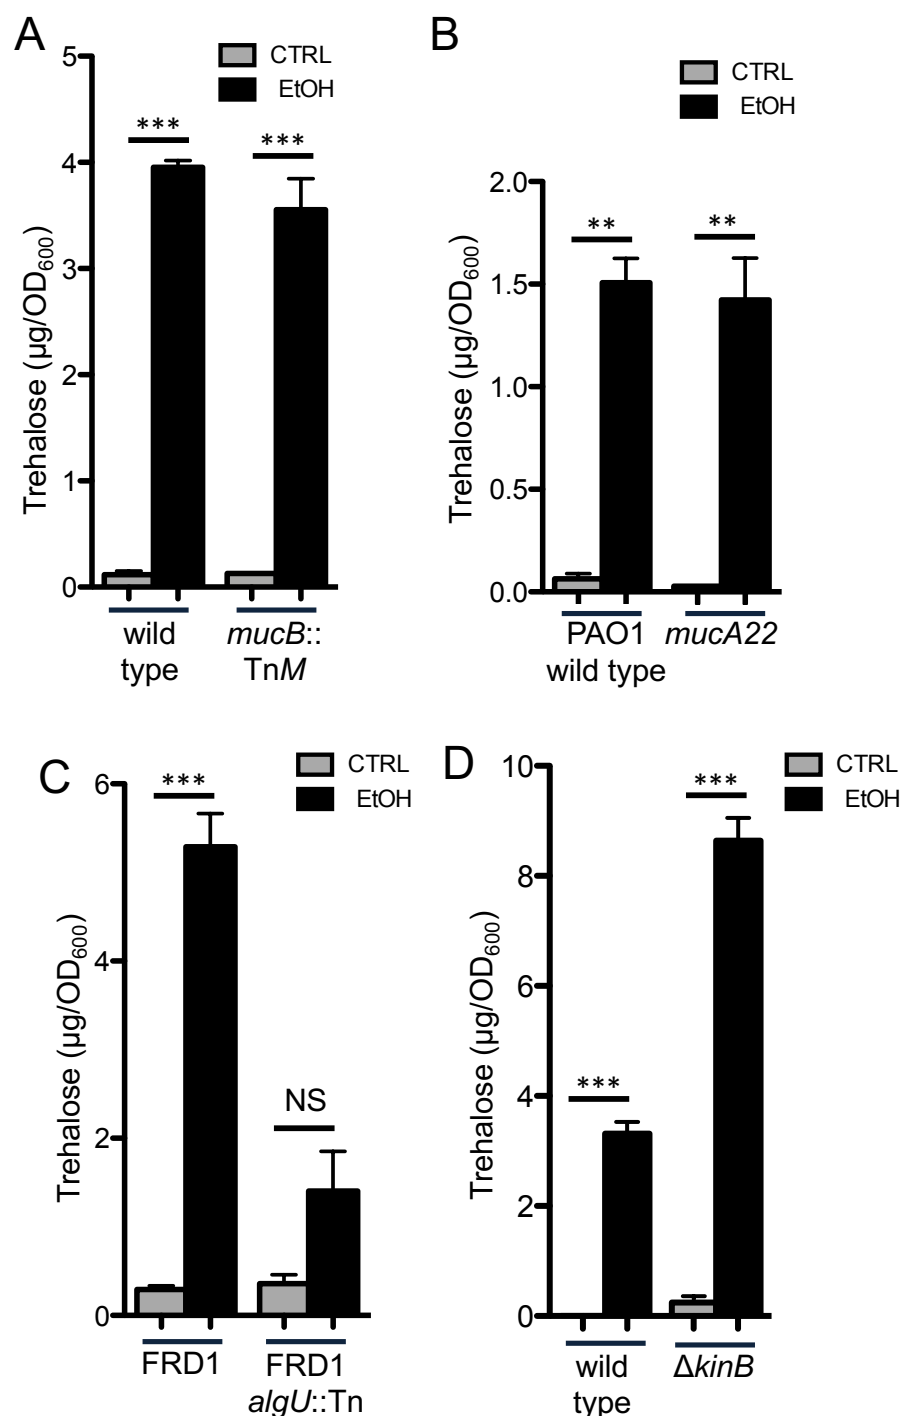

Figure 3. Trehalose levels in response to ethanol are independent of MucB, MucA cleavage, and KinB. Trehalose levels of A. *P. aeruginosa* strain PA14 wild type and the validated *mucB* transposon mutant. B. *P. aeruginosa* strain PAO1 wild type and a *mucA* (MucA22) mutant, C. FRD1 and its isogenic *algU::Tn* derivative. D. *P. aeruginosa* strain PA14 wild type and the  $\Delta kinB$  mutant. Cultures grown in M63 medium without and with 1% ethanol for 16 hours. Data are representative of at least 2 experiments, each with 3 biological replicates. Statistics based on two-way ANOVA and Tukey's multiple comparisons test \*\*\* p-value<0.0001; \*\* p<0.0002.

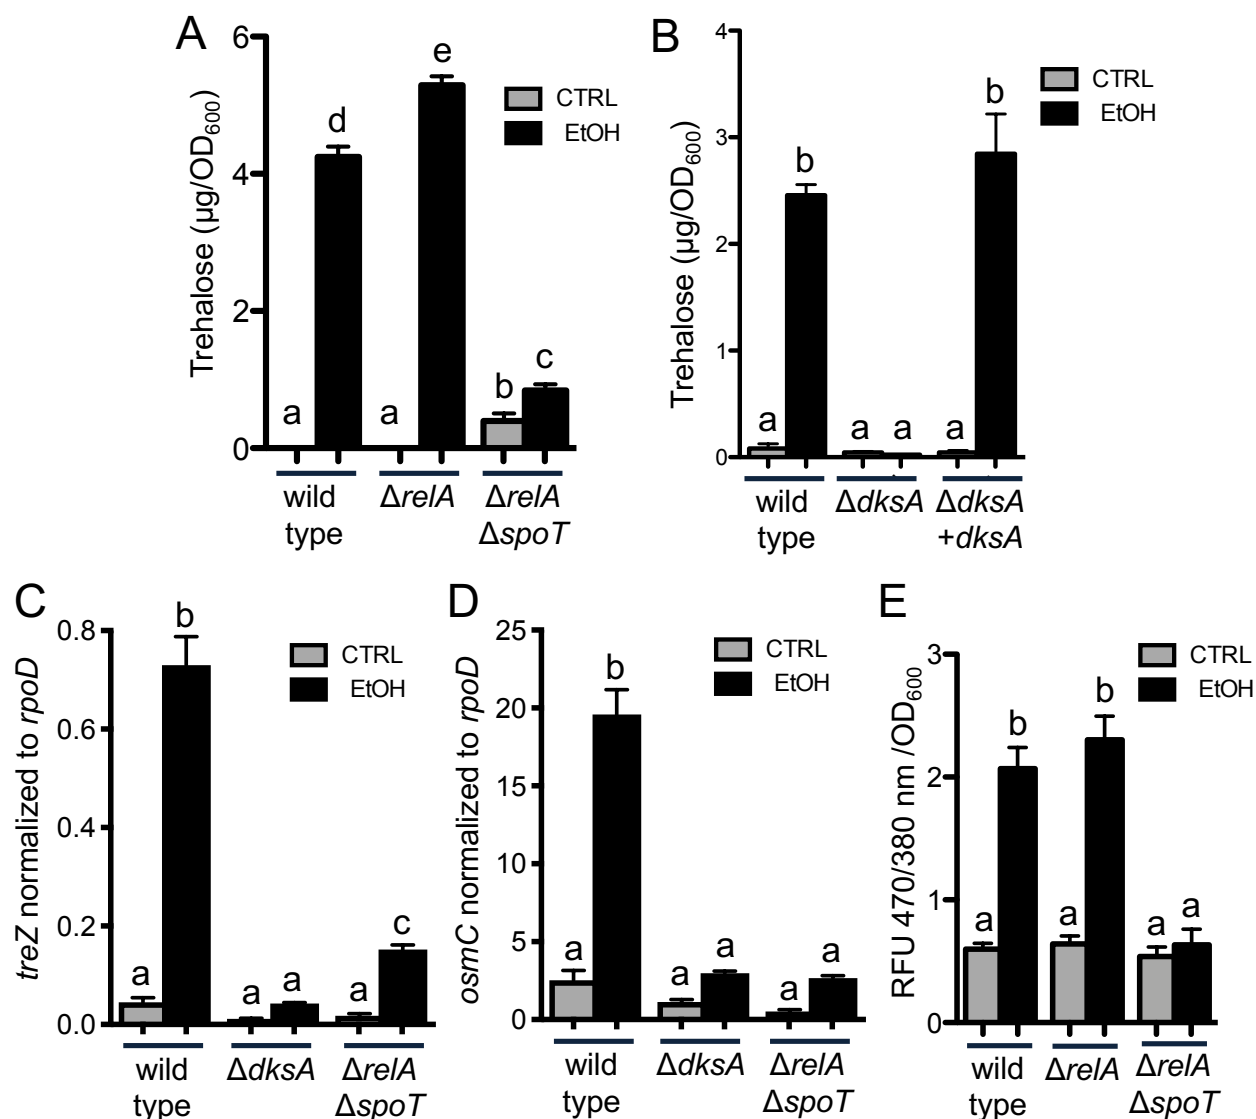

Figure 4. *dksA* and *spoT* are required for trehalose accumulation, *treZ* and *osmC* expression, and increased (p)ppGpp in response to ethanol. Trehalose levels of A. PA14 wild type,  $\Delta relA$ , and  $\Delta relA \Delta spoT$  and B. PA14 wild type,  $\Delta dksA$ , and  $\Delta dksA + dksA$  in M63 medium without and with 1% ethanol for 16 hours. C. *treZ* and D. *osmC* transcripts normalized to *rpoD* in PA14 wild type,  $\Delta dksA$ , and  $\Delta relA \Delta spoT$  in buffered LB at 16 hours without and with 1% ethanol. A-D Data are representative of at least 3 independent experiments with at least 3 biological replicates each. E. (p)ppGpp quantification of PA14 WT,  $\Delta relA$ , and  $\Delta relA \Delta spoT$  in M63 medium without and with 1% ethanol for 16 hours. Data are representative of at least 2 independent experiments. Statistics based on two-way ANOVA and Tukey's multiple comparisons test. A. a-b  $p=0.0179$ ; a-c, d-e  $p=0.0001$ ; a-d, a-e, b-d, b-e, c-d, c-e  $p<0.0001$ ; b-c = NS. B. a-b  $p<0.0001$ . C. a-b, b-c  $p<0.0001$ ; a-c  $p\leq 0.05$ . D. a-b  $p<0.0001$ . E. a-b  $p<0.0001$ .

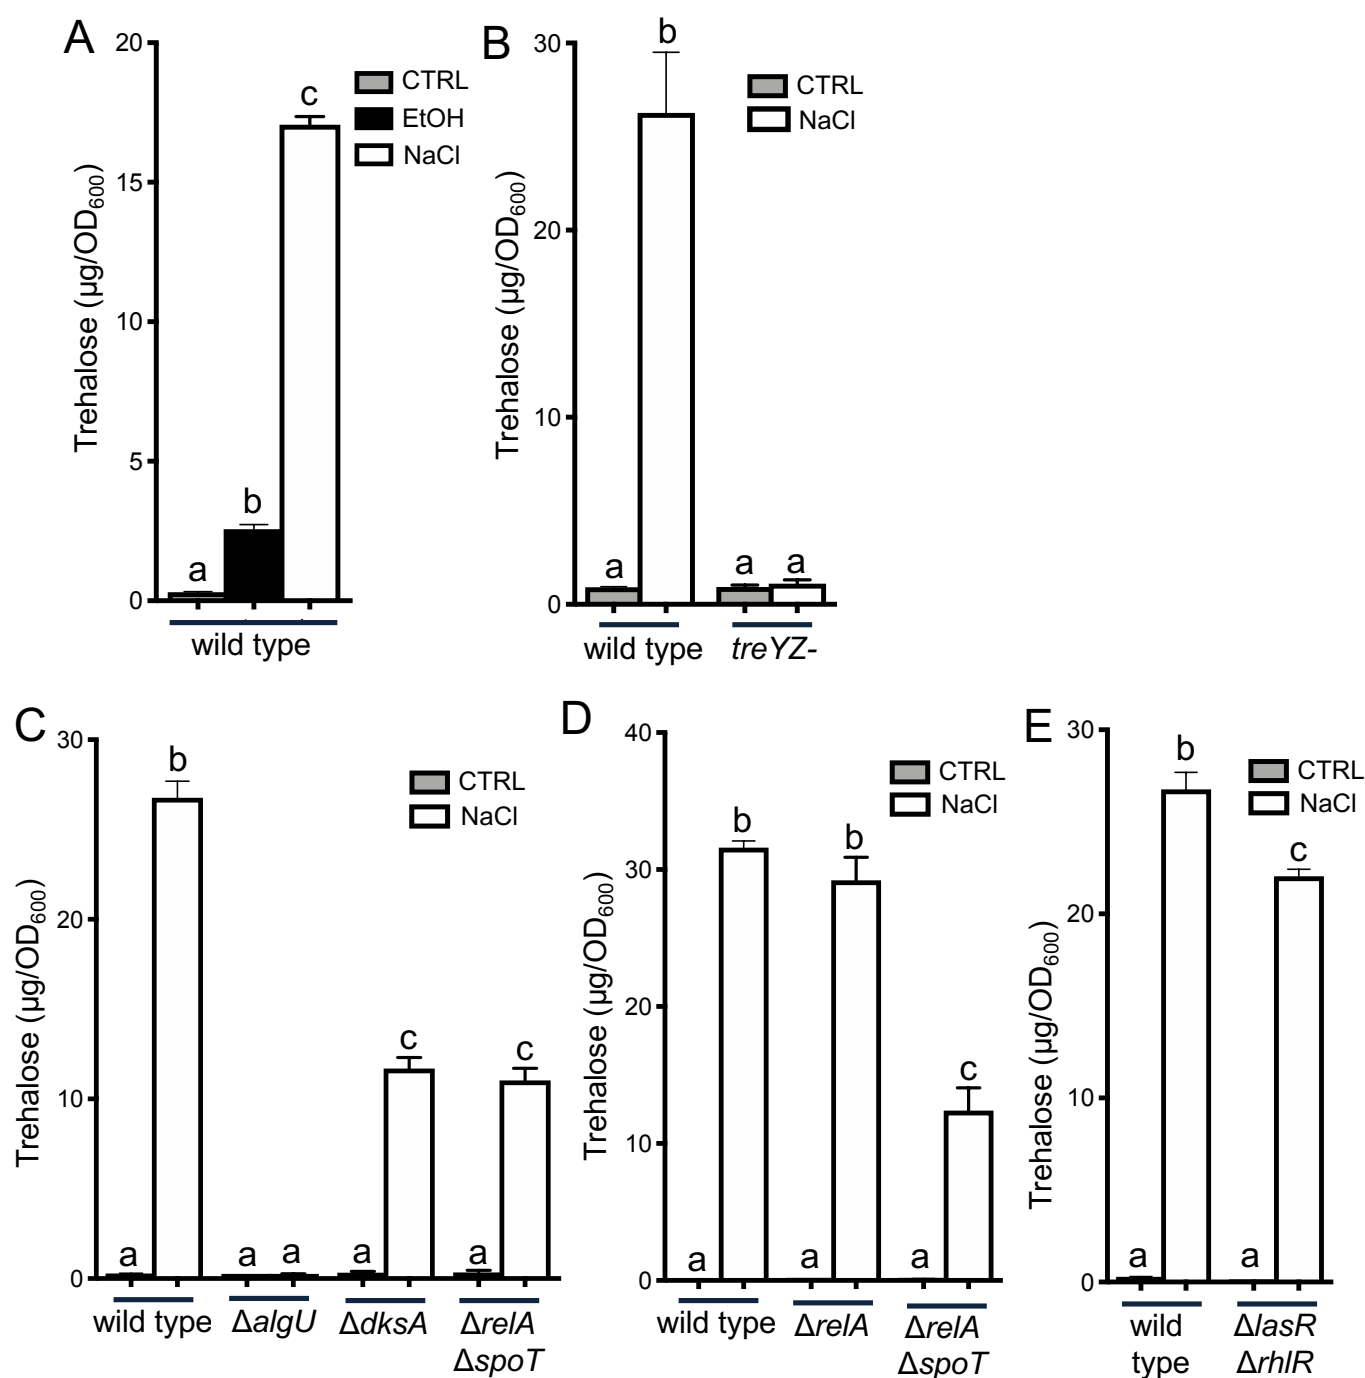

Figure 5. Trehalose accumulation in response to salt requires TreYZ and AlgU. A. 500 mM NaCl stimulates trehalose accumulation. B. Salt-stimulated accumulation of trehalose is dependent on the TreYZ pathway. C. Salt-stimulated trehalose accumulation requires *algU* and *dksA* and *spoT* contribute. D. Salt stimulated trehalose accumulation is independent of *relA*. E. Trehalose accumulation in salt is similar to wild type in  $\Delta lasR \Delta rhIR$ . Cultures were grown 16 hours in M63 medium with 1% ethanol or 500 mM NaCl as indicated. Data are representative of two or more experiments, each with at least 3 biological replicates. Statistics based on one-way ANOVA (A) or two-way ANOVA (B,C,D) and Tukey's multiple comparisons test. A. a-b  $p=0.0005$ ; a-c, b-c  $p<0.0001$ . B. a-b,  $p<0.0001$ . C. a-b, a-c, a-d, b-c,  $p<0.0001$ . D. a-b, a-c, a-d, b-c,  $p<0.0001$ . E. a-b, a-c  $p<0.0001$ ; b-c  $p=0.0007$ .

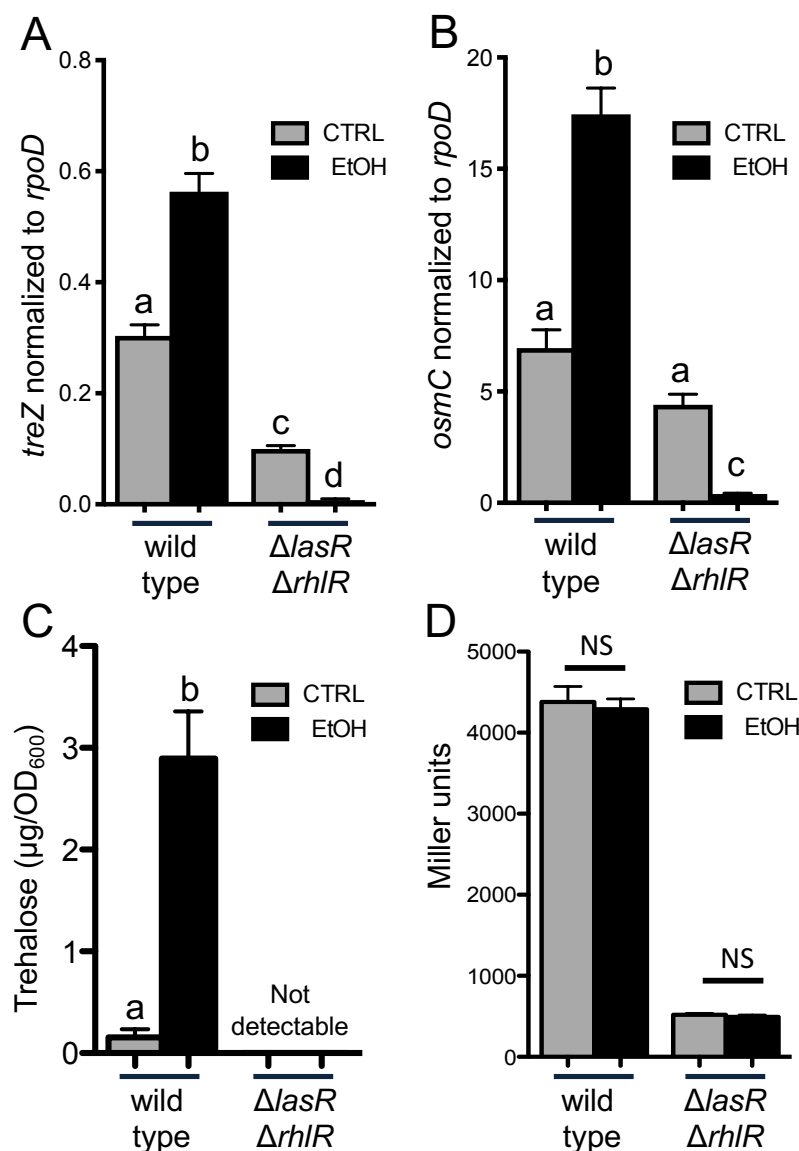

Figure 6. AHL quorum sensing regulation is required for trehalose accumulation and increased *treZ* and *osmC* transcripts in response to ethanol. A. Expression of *treZ* and B. *osmC* genes normalized to *rpoD* in PA14 wild type and  $\Delta lasR \Delta rhIR$  in buffered LB without and with 1% ethanol for 16 hours. C. Trehalose quantification of PA14 wild type and  $\Delta lasR \Delta rhIR$  cells grown planktonically in M63 medium without and with 1% ethanol for 16 hours. D.  $\beta$ -galactosidase assay of *rhII-lacZ* promoter activity in PA14 wild type and  $\Delta lasR \Delta rhIR$  cells grown planktonically in M63 medium without and with 1% ethanol for 16 hours. Data are representative of at least 2 independent experiments, each with 3 or more biological replicates. Statistics based on two-way ANOVA and Tukey's multiple comparisons test. A. a-b, a-d, b-c, b-d  $p < 0.0001$ ; a-c  $p = 0.0004$ ; c-d  $p = 0.0395$  B. a-b, b-c  $p < 0.0001$ ; a-c  $p < 0.02$ . C. a-b  $p = 0.0002$ .

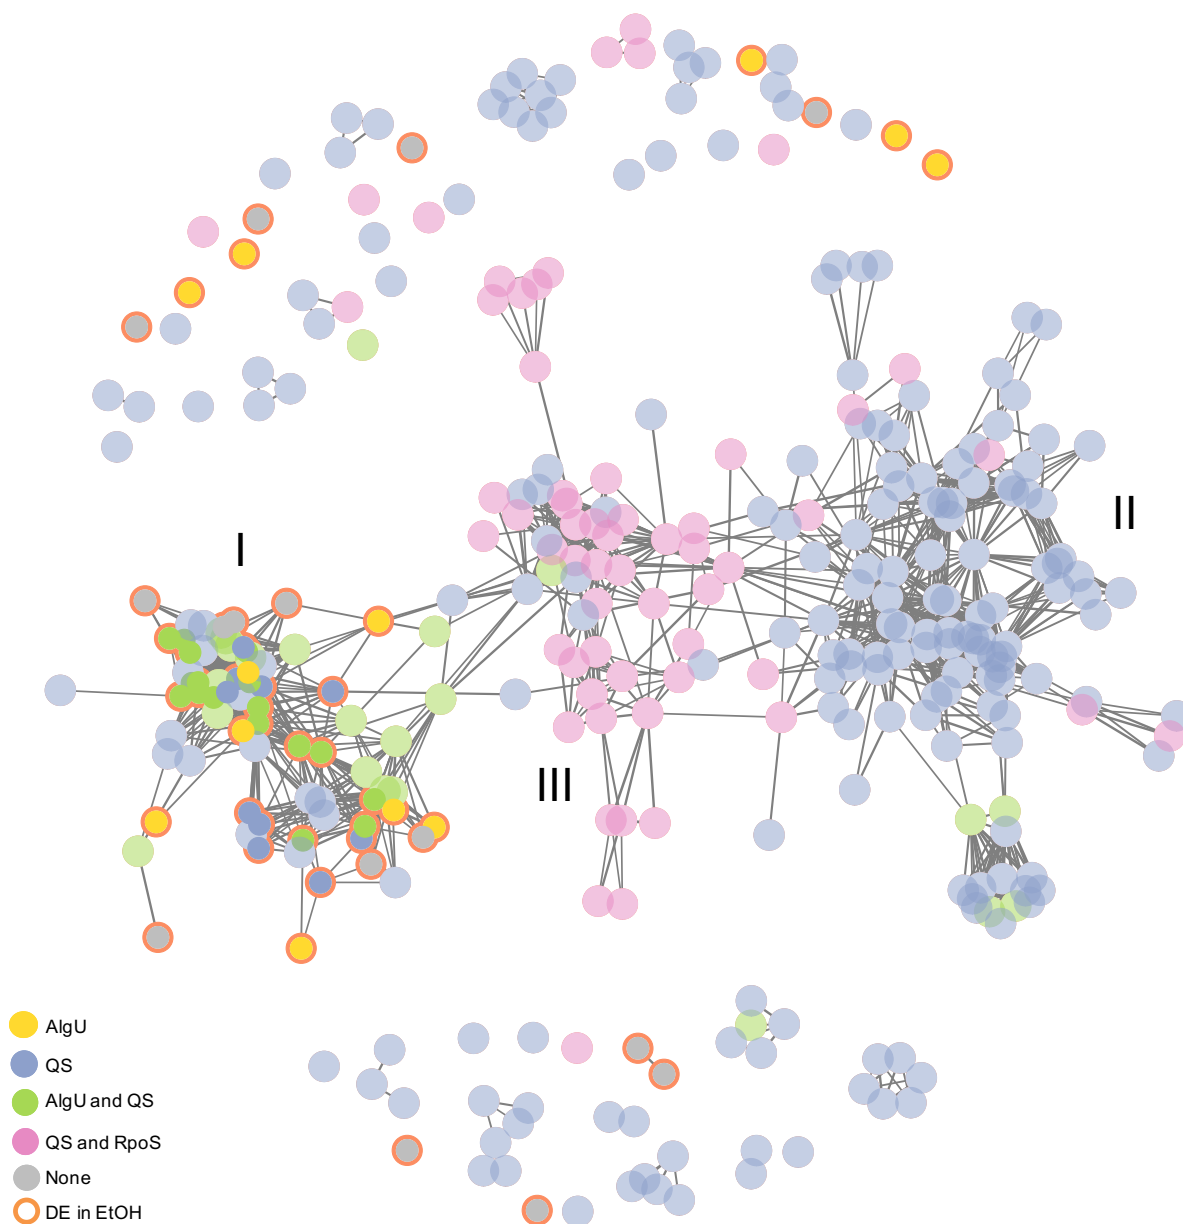

Figure 7. Ethanol responsive genes are enriched for genes with overlapping AlgU and QS control. eADAGE gene-gene network analysis of ethanol responsive genes and QS regulon genes with overlapping AlgU genes indicated. I. Enrichment region for genes coordinately regulated by AlgU and QS (green) and ethanol responsive genes (orange outline). II. Enrichment region for “canonical” quorum sensing genes including *lasI*, *lasB*, *rhIR*, *rhII*, and *rhIA*. III. Enrichment region for QS genes within the RpoS regulon.



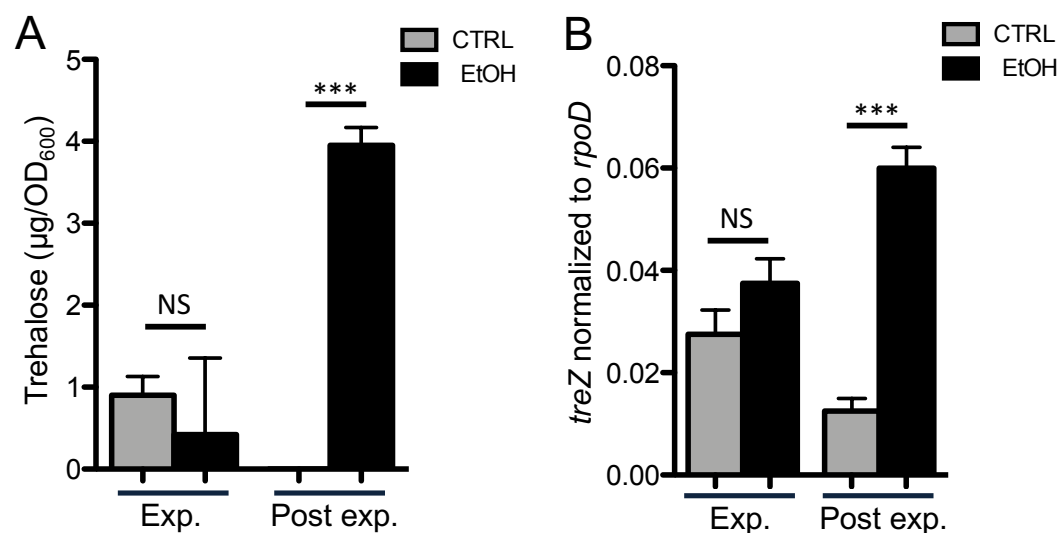

Figure 8. Ethanol stimulates *treZ* gene expression and trehalose levels in cells from post-exponential phase but not exponential cultures. A. Trehalose quantification of cells grown in M63 medium without and with 1% ethanol for 6 hours to an  $\text{OD}_{600}$  of  $\sim 1.0$  (Exp.) or 16 hours (Post exp.). B. *treZ* gene expression normalized to *rpoD* in cultures grown in buffered LB without and with 1% ethanol to the same densities as in A. Data are representative of 3 experiments, each with 2-4 biological replicates. Statistics based on two-way ANOVA and Tukey's multiple comparisons test. \*\*\* $p \leq 0.0008$ .

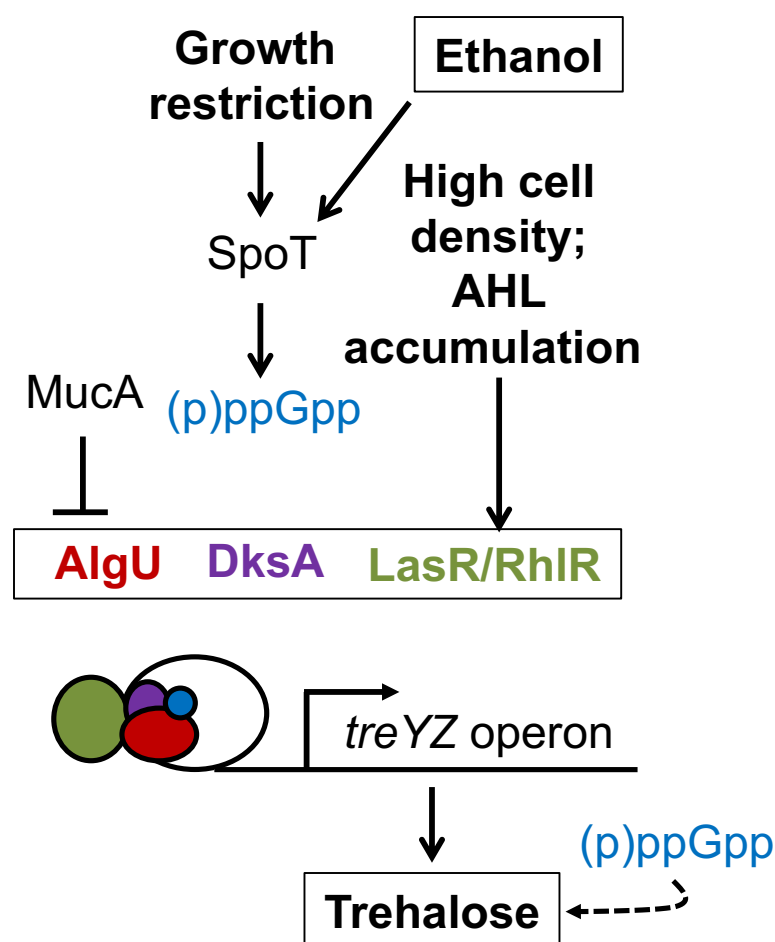

Figure 9. Model describing ethanol stimulation of the AlgU regulon and trehalose production. Our data support a model wherein cell density and growth signals determine the cell's response to ethanol. The colors of the text are reflected in the schematic of the transcriptional regulatory complex.
